# Supplementary material
Source: PubMed Central journal article supplement (PMC2855403)
Supplement: NIHMS179933-supplement-1_si_001.pdf [file NIHMS179933-supplement-1_si_001.pdf]

# SUPPORTING INFORMATION

## **Evolving Carbapenemases: Can Medicinal Chemists Advance One Step Ahead of the Coming Storm?**

**(Perspective)**

Peter Oelschlaeger,<sup>†,\*</sup> Ni Ai,<sup>‡</sup> Kevin T. DuPrez,<sup>†</sup> William J. Welsh,<sup>‡</sup> and Jeffrey H. Toney<sup>§</sup>

<sup>†</sup> *Chemistry Department and Center for Macromolecular Modeling and Materials Design, California State Polytechnic University, Pomona, California*

<sup>‡</sup> *Department of Pharmacology, Robert Wood Johnson Medical School and Informatics Institute, University of Medicine and Dentistry of New Jersey and Environmental Bioinformatics and Computational Toxicology Center, Piscataway, New Jersey*

<sup>§</sup> *College of Natural, Applied and Health Sciences, Kean University, Union, New Jersey*

\*To whom correspondence should be addressed. Phone: 909-869-3693. Fax: 909-869-4344.  
E-mail: oelschlaeger@csupomona.edu.

### **Table of Contents:**

#### **Additional Information on the Epidemiology of Clinically Important Carbapenemases**

|                                                              |               |
|--------------------------------------------------------------|---------------|
| <b>1. OXA <math>\beta</math>-Lactamases</b>                  | <b>S2</b>     |
| <b>2. <i>Klebsiella pneumoniae</i> Carbapenemases (KPCs)</b> | <b>S2-S3</b>  |
| <b>3. IMP <math>\beta</math>-Lactamases</b>                  | <b>S3-S5</b>  |
| <b>4. VIM <math>\beta</math>-Lactamases</b>                  | <b>S6-S8</b>  |
| <b>References</b>                                            | <b>S9-S25</b> |

## **Additional Information on the Epidemiology of Clinically Important Carbapenemases**

### **1. OXA $\beta$ -Lactamases**

Today, OXA-23 has been isolated in other European countries (Ireland,<sup>1</sup> Belgium,<sup>2</sup> Bulgaria,<sup>3</sup> and Germany<sup>4</sup>), but also in Africa (Tunisia<sup>5</sup>), Asia (Turkey,<sup>6</sup> Iran,<sup>7</sup> United Arab Emirates,<sup>8</sup> China,<sup>9</sup> Singapore,<sup>10</sup> Thailand,<sup>11</sup> and Korea<sup>12</sup>), including Asian-Pacific Nations,<sup>13, 14</sup> South America (Brazil<sup>15</sup>), and North America (U.S.<sup>16-18</sup>).

Several of the 162 variants of OXA  $\beta$ -lactamases documented to date also possess the ability to inactivate carbapenems, including OXA-24, isolated in Spain,<sup>19</sup> Iran,<sup>7</sup> Asian-Pacific Nations,<sup>13</sup> the U.S.,<sup>17, 18</sup> and Italy,<sup>20</sup> OXA-40, isolated in Portugal,<sup>21</sup> the U.S.,<sup>16</sup> Spain<sup>22</sup> and Asian-Pacific Nations,<sup>13</sup> OXA-48, isolated in Turkey<sup>23</sup> and Belgium,<sup>24</sup> OXA-51, isolated in Argentina,<sup>25</sup> Iran,<sup>7</sup> and South Korea,<sup>26</sup> OXA-58, isolated in France,<sup>27</sup> Argentina,<sup>28</sup> Greece,<sup>29</sup> Singapore,<sup>10</sup> Italy,<sup>30</sup> China,<sup>9</sup> Spain,<sup>31</sup> Lebanon,<sup>32</sup> Taiwan,<sup>33</sup> Bulgaria,<sup>3</sup> Ireland (GenBank accession code ACI25602), Turkey,<sup>6</sup> South Korea,<sup>34</sup> and Asian-Pacific Nations,<sup>13</sup> OXA-66, isolated in China,<sup>35</sup> Taiwan,<sup>36</sup> Greece,<sup>29</sup> France,<sup>37</sup> and South Korea,<sup>34</sup> OXA-72, isolated in China,<sup>9</sup> Taiwan<sup>38</sup> and South Korea,<sup>34</sup> OXA-83, OXA-109, and OXA-115, isolated in South Korea<sup>34</sup> (OXA-109 also in the U.K.<sup>39</sup>). These represent a few examples to illustrate the diversity and ubiquity of OXA  $\beta$ -lactamases.

### **2. *Klebsiella pneumoniae* Carbapenemases (KPCs)**

KPC-2 and KPC-3 were first isolated in the eastern U.S. and then spread to other states and countries. KPC-2 was first isolated in North Carolina in 1996,<sup>40</sup> then also in Maryland,<sup>41</sup> Massachusetts,<sup>42</sup> New York,<sup>43-45</sup> Pennsylvania,<sup>46</sup> Delaware, Ohio,<sup>47</sup> Arkansas, Virginia,<sup>48</sup> Missouri,<sup>49</sup> and recently also in more southern (Texas,<sup>50</sup> Georgia,<sup>51</sup> Florida<sup>52</sup>) and western (Colorado, New Mexico, Arizona, and California<sup>51</sup>) states. It has also been isolated outside the U.S.: in Israel,<sup>53</sup> France,<sup>54</sup> Greece,<sup>55</sup> Norway,<sup>56</sup> China,<sup>57</sup> Colombia,<sup>58</sup> Brazil,<sup>59</sup> Ireland,<sup>60</sup> Canada,<sup>61</sup> and Trinidad & Tobago.<sup>62</sup> Figure 4 in the main text shows the geographical distribution of KPC enzymes. KPC-3 was first isolated in New York in 2000.<sup>63</sup> It differs from KPC-2 only by a H272Y mutation. In a kinetic study,<sup>64</sup> this enzyme seemed to be more efficient toward a broad range of antibiotics, especially cephalosporins and carbapenems, than KPC-2.<sup>40, 43</sup> It has to be noted, however, that the kinetic data were acquired in different laboratories and may not be directly comparable. Similar to KPC-2, this enzyme has subsequently been isolated in other areas of the U.S. (Pennsylvania and Ohio<sup>65</sup> and California<sup>66</sup>) and other countries (Israel,<sup>67</sup> the U.K.,<sup>68</sup> and Sweden<sup>56</sup>). KPC-4 and KPC-5 were both isolated in Puerto Rico.<sup>69</sup> Figure 5 in the main text shows the relationship between KPC enzymes visualized by a phylogenetic tree. KPC-5 seems to be an evolutionary intermediate between KPC-2 and KPC-4: KPC-5 deviates from KPC-2 by one mutation (P103R), while KPC-4 deviates from KPC-2 by two mutations (P103R and V239G). These two variants are less efficient carbapenemases than KPC-2, but they inactivate the cephalosporin ceftazidime (Figure 3 in the main text) more efficiently.<sup>69</sup> It is conceivable that these enzymes took the evolutionary pathway KPC-2  $\rightarrow$  KPC-5  $\rightarrow$  KPC-4 to better inactivate ceftazidime, but also the evolutionary pathway KPC-4  $\rightarrow$  KPC-5  $\rightarrow$  KPC-2 to better inactivate carbapenems is possible. KPC-4 has also been isolated in Scotland (GenBank accession code AAU06362). Several other KPC variants have been isolated

and their sequences deposited, but not published yet in the form of articles: KPC-6 in Puerto Rico in 2008 (GenBank accession code ACB71165), KPC-7 in the U.S. in 2008 (GenBank accession code ACE62798), KPC-8 in Puerto Rico in 2008 (GenBank accession code ACI95258), KPC-9 in Israel in 2009 (GenBank accession code ACM91559), and KPC-10 in Puerto Rico (GenBank accession code GQ140348).

### **3. IMP $\beta$ -Lactamases**

After being isolated first in Japan,<sup>70, 71</sup> IMP-1 was isolated in several other Asian countries (South Korea,<sup>72</sup> Singapore,<sup>73</sup> China<sup>74</sup>, Taiwan,<sup>75</sup> Turkey,<sup>76</sup> and Lebanon<sup>77</sup>), in Europe (Italy,<sup>78</sup> the U.K.,<sup>79</sup> Spain,<sup>80</sup> and France<sup>81</sup>), and South America (Brazil<sup>82</sup>). The global spread of IMP-1 and other IMP variants is shown in Figure 6 of the main text.

IMP-2 was first isolated from *Acinetobacter baumannii* in Italy in 1997.<sup>83</sup> This enzyme was also isolated from *Serratia marcescens* in Japan (GenBank accession code AB182996). Its relatively low amino acid sequence identity (85%) to IMP-1, the difference between the gene cassettes carrying the IMP-1 and IMP-2 encoding genes, and the different geographic origins suggest different phylogenetic origins of IMP-1 and IMP-2.<sup>83</sup> The substrate spectrum of IMP-2 was overall similar to that of IMP-1 (penicillins, cephalosporins, and carbapenems, but not aztreonam), however, with significantly lower catalytic efficiencies toward ampicillin and cephaloridine and significantly higher catalytic efficiencies toward carbenicillin and meropenem<sup>83</sup> relative to IMP-1.<sup>84</sup> The phylogenetic tree in Figure 7 in the main text shows that IMP-1 and IMP-2 belong to two distinct groups of closely related enzymes; we will discuss these two groups in the following.

IMP-1 has four published homologs: IMP-6,<sup>85</sup> which differs by a S262G mutation; IMP-3,<sup>86</sup> which differs by a S262G mutation and a E126G mutation; IMP-10,<sup>87</sup> which differs by a V67F mutation; and IMP-26 (GenBank accession code EU541448), which differs by a G232S mutation and a S262G mutation from IMP-1. All of these enzymes of the “IMP-1 cluster” were isolated in Japan, the apparent origin country of IMP-1, or South Korea: IMP-6 from *Serratia marcescens*,<sup>85</sup> IMP-3 from *Shigella flexneri*,<sup>86</sup> IMP-10 from *Pseudomonas aeruginosa* and *Alcaligenes xylooxidans*,<sup>87</sup> and IMP-26 from *Pseudomonas aeruginosa*. IMP-6 and IMP-3 have almost identical substrate spectra that deviate from that of IMP-1 in that catalytic efficiencies are smaller toward cephaloridine, ceftazidime, penicillins, and imipenem<sup>88, 89</sup> but higher toward meropenem.<sup>85</sup> This indicates that the mutation at position 126 has little impact while the one at position 262 has a significant, substrate-specific effect. Site-directed mutagenesis showed that alanine at this position confers catalytic efficiencies that are intermediate to those conferred by glycine (IMP-6) and serine (IMP-1) and that valine creates higher catalytic efficiencies toward nitrocefin, cephalothin, and cefotaxime, but very low catalytic efficiencies toward ceftazidime, penicillins, and imipenem.<sup>89</sup> It seems that IMP-1 may have evolved from IMP-3 via IMP-6 to acquire a broader substrate spectrum, while the intermediate, IMP-6, has an evolutionary advantage over IMP-1 with respect to the inactivation of meropenem.<sup>85</sup> In agreement with this scenario, we did not find any reports on IMP-3 besides the original publication,<sup>85</sup> but IMP-6 has recently been found in clinical isolates of *Pseudomonas aeruginosa* in Japan (GenBank accession code AB188812) and South Korea.<sup>90</sup> IMP-10 exhibits slightly higher catalytic efficiencies toward most cephalosporins, but significantly lower catalytic efficiencies toward

most penicillins than IMP-1,<sup>87</sup> suggesting that it is a variant specializing in the inactivation of cephalosporins and carbapenems. IMP-10 was isolated on other occasions in Japan from *Pseudomonas aeruginosa*<sup>91</sup> and *Serratia marcescens*.<sup>92</sup> The addition of a longer bulky group in phenylalanine compared to valine at position 67 in the substrate binding site could be responsible for the decreased inactivation of penicillins.

IMP-2, IMP-8, IMP-19, IMP-20, and IMP-24 form another cluster of closely related enzymes, the “IMP-2 cluster”. There are very few reports on IMP-2, indicating that it may be clinically less important than IMP-1, but several of its close variants have been reported repeatedly. IMP-19 differs from IMP-2 only by an R38A mutation and has been isolated from *Aeromonas caviae*, also in France like IMP-2. Its activity profile was quite different from that of IMP-2;<sup>83</sup> especially the catalytic efficiencies toward imipenem and meropenem were significantly lower,<sup>93</sup> suggesting that IMP-19 might be a precursor of IMP-2. However, it is not clear how comparable the data acquired in different laboratories are. Even though not published as articles, IMP-19 has also been found in *Achromobacter xylosoxidans*, *Enterobacter cloacae*, and *Pseudomonas putida* (GenBank accession codes AB201263, AB201264, and AB201265, respectively), *Pseudomonas aeruginosa* and *Acinetobacter baumannii* (GenBank accession codes 184976 and 184977), supporting the possibility that IMP-2 might be a precursor of IMP-19. Residue 38 is very close to the N-terminus of the mature protein, which lies on top of the  $\beta$  hairpin loop covering the active site (PDB entry 1DD6<sup>94</sup>); thus, it could play a role in substrate binding. IMP-20, isolated from *Pseudomonas aeruginosa* in Japan (GenBank accession code AB196988), harbors an additional V67F mutation relative to IMP-19. Interestingly, IMP-20 has this mutation in common with IMP-10 relative to IMP-1. It would be interesting to see whether the changes in substrate profile between IMP-19 and IMP-20 parallel those between IMP-10 and IMP-1.<sup>87</sup> IMP-8 differs from IMP-19 by a V254G mutation. It has been isolated from *Klebsiella pneumoniae*<sup>95</sup> and *Enterobacter cloacae*<sup>96</sup> in Taiwan and from *Acinetobacter baumannii* in China.<sup>97</sup> IMP-24, isolated from *Serratia marcescens* in Taiwan (GenBank accession code EF192154), differs from IMP-8 by a K315R mutation. Since both mutations V254G (observed in IMP-8 and IMP-24) and K315R (observed in IMP-24) occur on the surface of the protein opposite the active site and are quite conservative, we do not expect them to have dramatic effects on catalytic efficiencies.

Two other pairs of IMPs, IMP-11 and IMP-21, as well as IMP-9 and IMP-25, differ only by one mutation. IMP-21 harbors a V67A mutation relative to IMP-11. We have observed the V67F mutation in IMP-10 where it was reported to decrease activity toward penicillins and in IMP-20, but the mutation to the short hydrophobic side chain in alanine is not expected to significantly affect the substrate spectrum. Both enzymes have not yet been characterized biochemically. IMP-11 has been isolated from *Acinetobacter baumannii* and *Pseudomonas aeruginosa* in Japan (GenBank accession codes AB074436 and AB074437); IMP-21 was isolated from *Pseudomonas aeruginosa* in Japan (GenBank accession code AB204557). Overall, IMP-11 and IMP-21 deviate significantly from both the IMP-1 and IMP-2 clusters, but are a little closer to the IMP-2 cluster. IMP-25 (GenBank accession code EU352796) differs by a S262G mutation from IMP-9<sup>98</sup> (just like IMP-6 from IMP-1). Accordingly, we would hypothesize that IMP-9 has higher catalytic efficiencies toward penicillins, ceftazidime, cephaloridine, and imipenem than IMP-25. Both enzymes were isolated from *Pseudomonas aeruginosa* in China.

Overall these enzymes are also distant from the IMP-1 and IMP-2 clusters, but a little closer to the IMP-1 cluster.

The other published IMPs have not currently been found in clusters with very closely related variants. IMP-4 was first isolated in the late nineties from *Acinetobacter baumannii* in Hong Kong<sup>99</sup> and shortly after from *Citrobacter youngae* in China.<sup>100</sup> It is phylogenetically close to the IMP-1 cluster. In 2004, it was isolated from a patient with a *Pseudomonas aeruginosa* infection in Melbourne, Australia.<sup>101</sup> The IMP-4 gene was soon detected in several isolates of a clinical outbreak in Melbourne, including *Serratia marcescens*, *Klebsiella pneumoniae*, *Pseudomonas aeruginosa*, *Escherichia coli*, and *Enterobacter cloacae*,<sup>102</sup> and subsequently also in *Acinetobacter junii*.<sup>103</sup> IMP-4 was also isolated from *Klebsiella pneumoniae*, *Enterobacter cloacae*, and *Citrobacter amalonaticus* in Sydney, Australia.<sup>104</sup> Later, it was also isolated from *Pseudomonas aeruginosa* in a French patient repatriated from Malaysia,<sup>105</sup> from *Acinetobacter baumannii* in Singapore,<sup>10</sup> from *Klebsiella pneumoniae* in China,<sup>106</sup> from *Acinetobacter johnsonii* on the Phillipines,<sup>13</sup> and from *Acinetobacter* spp. in Malaysia.<sup>107</sup> IMP-5 was isolated in 1998 from *Acinetobacter baumannii*<sup>108</sup> and later from *Pseudomonas aeruginosa*<sup>109</sup> in Portugal. This enzyme is more closely related to the IMP-1 cluster than to the IMP-2 cluster. The first IMP enzyme to be discovered in the Americas was IMP-7, which was isolated from *Pseudomonas aeruginosa* in Canada in 1995 and 1996.<sup>110</sup> IMP-7 is most closely related to IMP-5. It was later also isolated in Malaysia,<sup>111</sup> Slovakia,<sup>112</sup> Japan,<sup>113</sup> and the Czech Republic.<sup>114</sup> IMP-12 was isolated from *Pseudomonas putida* in Italy and is phylogenetically more closely related to the IMP-2 cluster than the IMP-1 cluster.<sup>115</sup> IMP-12 is mostly characterized by low catalytic efficiencies toward some penicillins relative to IMP-1.<sup>115</sup> IMP-13 was isolated from *Pseudomonas aeruginosa* in 2001 in Rome, Italy,<sup>116</sup> and in 2003 in a clinical outbreak of the same organism in southern Italy.<sup>117</sup> This enzyme is also closely related to the IMP-2 cluster. It has also been found in *Salmonella enterica* in Colombia,<sup>118</sup> in *Pseudomonas aeruginosa* in Romania,<sup>119</sup> Argentina,<sup>120</sup> and Austria.<sup>121</sup> IMP-14 and IMP-15 were both first isolated from *Pseudomonas aeruginosa* in Thailand (GenBank accession codes AY553332 and AY553333). Interestingly, these variants are not closely related. While IMP-14 is more closely related to the IMP-2 cluster, IMP-15 is more closely related to the IMP-1 cluster. IMP-15 was recently isolated from *Pseudomonas aeruginosa* in Kentucky, USA, and it was likely imported from Mexico, where the patient was injured and initially treated.<sup>122</sup> In fact, the enzyme was isolated from the same organism in Mexico in Guadalajara<sup>123</sup> and Mexico City.<sup>124</sup> IMP-16 was isolated from *Pseudomonas aeruginosa* in Brazil.<sup>125</sup> It is closely related to the couple IMP-11/IMP-21 and a little less closely to IMP-12. No catalytic efficiencies are available for IMP-11 and IMP-21, but the catalytic efficiencies of IMP-16<sup>125</sup> are remarkably similar to those of IMP-12,<sup>115</sup> especially with respect to low catalytic efficiencies toward penicillins and imipenem. IMP-17 has been assigned, but not published, yet.<sup>126</sup> IMP-18 was isolated from *Pseudomonas aeruginosa* in the U.S.,<sup>127</sup> Mexico,<sup>128</sup> and Puerto Rico.<sup>129</sup> IMP-18 is most closely related to IMP-14. IMP-22 was isolated both from *Pseudomonas fluorescens* in waste water and *Pseudomonas aeruginosa* in a teaching hospital in Italy<sup>130</sup> and in Austria.<sup>121</sup> While this enzyme is phylogenetically most closely related to IMP-16, its activity profile is more similar to that of IMP-1.<sup>130</sup> IMP-23 has been assigned but not yet published.<sup>126</sup>

#### **4. VIM $\beta$ -Lactamases**

Apart from *Pseudomonas aeruginosa* in Italy, VIM-1 has been reported in other European countries (Greece,<sup>131</sup> Spain,<sup>132</sup> France,<sup>133</sup> and Germany<sup>134</sup>) and in Turkey,<sup>135</sup> but to our knowledge not outside these countries. In addition to *Pseudomonas aeruginosa*, this enzyme has also been isolated from *Klebsiella pneumoniae* and *Escherichia coli*,<sup>132</sup> *Enterobacter cloacae*,<sup>136</sup> *Acinetobacter baumannii*,<sup>137</sup> *Citrobacter freundii*,<sup>134</sup> *Klebsiella oxytoca*,<sup>138</sup> *Providencia stuartii*,<sup>139</sup> and *Serratia liquefaciens*.<sup>140</sup> The global spread of VIM-1 and other VIM enzymes is depicted in Figure 8 in the main text.

Twenty two variants of VIM-1 have been reported to date.<sup>126</sup> Their phylogenetic relationships are shown in Figure 9 in the main text. VIM-2, the second VIM enzyme to be reported, was actually isolated prior to VIM-1 in 1996 in France, also from *Pseudomonas aeruginosa*.<sup>141</sup> Its amino acid sequence is 90% identical to that of VIM-1 and it also hydrolyzes all tested  $\beta$ -lactam antibiotics except the monobactam aztreonam.<sup>141</sup> Its activity toward cephalosporins is similar to and that toward penicillins and carbapenems higher than that of VIM-1.<sup>142</sup> Geographically, VIM-2 is more widely spread than VIM-1. Besides France, it has been found in other European countries (Greece,<sup>143</sup> Portugal,<sup>144</sup> Poland,<sup>145</sup> Croatia,<sup>146</sup> Italy,<sup>147</sup> Germany,<sup>148</sup> Spain,<sup>149</sup> Belgium,<sup>150</sup> Hungary,<sup>151</sup> Romania,<sup>119</sup> the U.K.<sup>152</sup>, Serbia,<sup>153</sup> and Austria<sup>121</sup>), but also in Asia (Korea,<sup>154</sup> Taiwan,<sup>96</sup> Japan,<sup>155</sup> Saudi Arabia,<sup>156</sup> China,<sup>157</sup> India and Russia,<sup>158</sup> and Turkey<sup>159</sup>), South America (Chile,<sup>160</sup> Venezuela and Brazil,<sup>161</sup> and Colombia<sup>162</sup>), North America (U.S.,<sup>163, 164</sup> Canada,<sup>165</sup> and Mexico<sup>166</sup>), and Africa (Tunisia<sup>167</sup> and Kenya<sup>168</sup>). Similar to VIM-1, VIM-2 has been isolated from several different species: originally *Pseudomonas aeruginosa*,<sup>141</sup> but then also from *Serratia marcescens*,<sup>169</sup> *Acinetobacter baumannii*,<sup>170</sup> *Citrobacter freundii*,<sup>96</sup> *Enterobacter cloacae*,<sup>171</sup> *Klebsiella oxytoca*,<sup>172</sup> *Klebsiella pneumoniae*,<sup>173</sup> *Achromobacter xylosoxidans*,<sup>174</sup> *Pseudomonas putida*,<sup>175</sup> *Providencia* spp.,<sup>176</sup> and *Enterobacter aerogenes*.<sup>81</sup> VIM-2 is also the only enzyme of the VIM group that has been crystallized, in complex with a mercaptocarboxylate inhibitor<sup>177</sup> and as the free enzyme both with an oxidized and reduced Cys221.<sup>178</sup>

VIM-3 is a variant of VIM-2 that was isolated from *Pseudomonas aeruginosa* in Taiwan.<sup>179</sup> This variant deviates from VIM-2 by only two mutations: Q59K (in the original publication falsely reported as G59K<sup>179</sup>) and N165S. In susceptibility assays, VIM-3 appeared to confer slightly higher resistance levels, especially toward ceftazidime, than VIM-2.<sup>179, 180</sup> To our knowledge, VIM-3 has not been reported outside Taiwan. VIM-4 differs from VIM-1 by only one mutation, S228R, and, just like VIM-1, has been isolated in Greece.<sup>181</sup> Arginine is also found at position 228 in VIM-2 and VIM-3. VIM-4 was subsequently isolated in other European countries (Sweden,<sup>182</sup> Italy,<sup>183</sup> Poland,<sup>184</sup> Hungary,<sup>185</sup> France,<sup>186</sup> and Belgium<sup>187</sup>), but also in North African Tunisia<sup>188</sup> and Australia.<sup>189</sup> Interestingly, VIM-4 isolated in Australia from a patient with a *Pseudomonas aeruginosa* infection was most likely transferred from Greece, where the patient was treated before being transferred to Australia. In addition, the patient was infected with *Acinetobacter baumannii* carrying OXA-58.<sup>189</sup> VIM-4 was isolated from *Pseudomonas aeruginosa*,<sup>181</sup> *Klebsiella pneumoniae* and *Enterobacter cloacae*,<sup>183</sup> *Acinetobacter* spp.,<sup>186</sup> *Pseudomonas putida*,<sup>187</sup> and *Aeromonas hydrophila*.<sup>190</sup> VIM-5 differs from VIM-4 by only four mutations: A130K, H224L, E225A, and K291T. This variant was isolated from *Klebsiella pneumoniae* and *Pseudomonas aeruginosa* in Turkey in 2003.<sup>191</sup> Later on, it was

isolated in the same country from *Enterobacter cloacae*<sup>192</sup> and *Pseudomonas putida*,<sup>193</sup> and from *Pseudomonas aeruginosa* in India.<sup>194</sup> VIM-6 is most closely related to VIM-3, from which it differs by only one mutation, K59R. It was isolated from *Pseudomonas putida* in Singapore in 2000<sup>195</sup> and from *Pseudomonas aeruginosa* in India in 2006.<sup>194</sup> As the other VIM enzymes, VIM-6 is also integron-borne and efficiently inactivates all tested  $\beta$ -lactams except aztreonam.<sup>196</sup> VIM-7 is the first VIM enzyme to be isolated in the U.S.. Its gene was found on an integron in a *Pseudomonas aeruginosa* isolate in 2001.<sup>197</sup> VIM-2 was not isolated in the U.S. until 2003.<sup>163</sup> VIM-7 has less sequence identity (77%) to VIM-1 than any of the other variants up to VIM-6 (89 to 99%). It has therefore been suggested that VIM-7 has arisen independently in the U.S. rather than having been imported from Europe or Asia, where VIM-1 to VIM-6 have been reported first.<sup>197</sup> VIM-2, on the other hand, may have been disseminated to the U.S. from Jordan.<sup>164</sup> VIM-7 effectively hydrolyzes all tested  $\beta$ -lactam antibiotics except aztreonam.<sup>142</sup> Its activity toward cephalosporins is lower and that toward penicillins higher than that of VIM-2.<sup>142</sup> Its activity toward the two carbapenems imipenem and meropenem is similar to, but that toward ertapenem significantly higher than that of VIM-2.<sup>142</sup> It has been suggested that some of the changes in catalytic efficiencies may be due to a Y218F mutation.<sup>142</sup> VIM-8 is a VIM-2 variant that differs from that enzyme by only a T142A mutation. VIM-8 was isolated from *Pseudomonas aeruginosa* in Colombia.<sup>198</sup> Since VIM-2 has been found in this country as well,<sup>199</sup> VIM-8 may have evolved from VIM-2 or vice versa. No kinetic data have been reported for VIM-8, but the fact that it has been found in clinical isolates suggests that the T142A mutation has no significantly detrimental effect on enzyme activity. In crystal structures of VIM-2, T142 is at distances of about 10 Å from the active site Zn1 and 13 Å from Zn2.<sup>177, 178</sup> VIM-9 is also a point mutant of VIM-2 (and VIM-8) with a T142I mutation at the same position. This variant has been isolated from *Pseudomonas aeruginosa* in the U.K. (GenBank accession code AY524988), where VIM-2 has also been found.<sup>152</sup> The fact that threonine (VIM-2) can be mutated to either alanine (VIM-8) or isoleucine (VIM-9) by a single nucleotide change, but that two nucleotide changes are necessary to interconvert alanine and isoleucine suggests that VIM-2 is the common ancestor of VIM-8 and VIM-9 (see Figure 9 in the main text). VIM-10 was also isolated from *Pseudomonas aeruginosa* in the U.K. and is yet another point mutant of VIM-2, carrying a F258Y mutation.<sup>200</sup> VIM-11 was isolated from *Pseudomonas aeruginosa* in Argentina.<sup>201</sup> Interestingly, this enzyme seems to be an evolutionary intermediate between VIM-2 and VIM-3 or VIM-6: VIM-11 can be obtained from VIM-2 through a N165S mutation, and VIM-3 and VIM-6 can be obtained from VIM-11 through a Q59K and Q59R mutation, respectively.<sup>201</sup> VIM-11 was later also isolated from *Acinetobacter baumannii* in Taiwan<sup>202</sup> and from *Pseudomonas aeruginosa* in India.<sup>194</sup> Determination of kinetic constants of VIM-11 relative to VIM-2 revealed that VIM-11 exhibits higher catalytic efficiencies toward ceftazidime (four-fold), cefepime (three-fold), and cefpirome (two-fold).<sup>203</sup> VIM-12, isolated in Greece from *Klebsiella pneumoniae*, seems to be a hybrid of VIM-1 and VIM-2 with the N-terminal region corresponding to VIM-1 and the C-terminal region corresponding to VIM-2<sup>204</sup> (hence its position between the clusters around VIM-1 and VIM-2 in Figure 9 in the main text). It was suggested that VIM-12 may have arisen in a hospital environment, in which both VIM-1 and VIM-2 producing organisms are endemic.<sup>204</sup> This enzyme was later also isolated from *Escherichia coli*, also in Greece.<sup>205</sup> Biochemical characterization of VIM-12 revealed a narrow substrate spectrum,

limited to penicillins.<sup>206</sup> VIM-13 is a variant of VIM-1, exhibiting 93% sequence identity and was isolated from *Pseudomonas aeruginosa* on the Spanish Island Mallorca.<sup>207</sup> Its catalytic efficiency toward most tested  $\beta$ -lactam antibiotics was about double of that of VIM-1 except for ceftazidime and cefepime, for which its catalytic efficiency was lower.<sup>207</sup> VIM-14 was isolated from *Pseudomonas aeruginosa* in Italy (GenBank accession code AY635904) and Spain (GenBank accession code ABK63186) and differs from VIM-4 by only one mutation. VIM-15 and VIM-16 were isolated from *Pseudomonas aeruginosa* in Bulgaria and Germany, respectively.<sup>208</sup> They differ from VIM-2 by one mutation each: VIM-15 by Y218F, which was also observed in VIM-7, and VIM-16 by S54L, not observed in any other VIM variants.<sup>208</sup> Overall, VIM-15 exhibited higher catalytic efficiency toward all tested substrates than VIM-2 and VIM-16, and it was concluded that the Y218F mutation enhances catalytic efficiency, whereas S54L had no significant effect.<sup>208</sup> VIM-17 was isolated from *Pseudomonas aeruginosa* in Greece<sup>209</sup> and differs from VIM-2 only by a mutation in the leader sequence, that is, the mature protein is identical. VIM-18 was recently reported in *Pseudomonas aeruginosa* isolates in India.<sup>194</sup> This enzyme has a four-amino acid deletion compared to the other VIM enzymes.<sup>194</sup> VIM-19 has been isolated from *Providencia stuartii*, *Escherichia coli*, and *Klebsiella pneumoniae* isolates recovered from Algerian patients.<sup>210, 211</sup> It has two mutations, N215K and S228R, compared to VIM-1, and only one, S228R, compared to VIM-4. This variant hydrolyzes carbapenems better than VIM-1 and both mutations are critical for this improvement.<sup>211</sup> VIM-20 through VIM-22 have been assigned, but not published, yet.<sup>126</sup> VIM-23 was isolated from *Enterobacter cloacae* in Mexico (GenBank accession code GQ242167).



## References

- (1) Boo, T. W.; Walsh, F.; Crowley, B. First report of OXA-23 carbapenemase in clinical isolates of *Acinetobacter* species in the Irish Republic. *J. Antimicrob. Chemother.* **2006**, *58*, 1101-1102.
- (2) Bogaerts, P.; Cuzon, G.; Naas, T.; Bauraing, C.; Deplano, A.; Lissioir, B.; Nordmann, P.; Glupczynski, Y. Carbapenem-resistant *Acinetobacter baumannii* isolates expressing the blaOXA-23 gene associated with ISAba4 in Belgium. *Antimicrob. Agents Chemother.* **2008**, *52*, 4205-4206.
- (3) Stoeva, T.; Higgins, P. G.; Savov, E.; Markovska, R.; Mitov, I.; Seifert, H. Nosocomial spread of OXA-23 and OXA-58  $\beta$ -lactamase-producing *Acinetobacter baumannii* in a Bulgarian hospital. *J. Antimicrob. Chemother.* **2009**, *63*, 618-620.
- (4) Kohlenberg, A.; Brummer, S.; Higgins, P. G.; Sohr, D.; Piening, B. C.; de Grahl, C.; Halle, E.; Ruden, H.; Seifert, H. Outbreak of carbapenem-resistant *Acinetobacter baumannii* carrying the carbapenemase OXA-23 in a German University Medical Centre. *J. Med. Microbiol.* **2009**, *58*, 1499-1507.
- (5) Mansour, W.; Poirel, L.; Bettaieb, D.; Bouallegue, O.; Boujaafar, N.; Nordmann, P. Dissemination of OXA-23-producing and carbapenem-resistant *Acinetobacter baumannii* in a University Hospital in Tunisia. *Microb. Drug Resist.* **2008**, *14*, 289-292.
- (6) Gur, D.; Korten, V.; Unal, S.; Deshpande, L. M.; Castanheira, M. Increasing carbapenem resistance due to the clonal dissemination of oxacillinase (OXA-23 and OXA-58)-producing *Acinetobacter baumannii*: report from the Turkish SENTRY Program sites. *J. Med. Microbiol.* **2008**, *57*, 1529-1532.
- (7) Feizabadi, M. M.; Fathollahzadeh, B.; Taherikalani, M.; Rasoolinejad, M.; Sadeghifard, N.; Aligholi, M.; Soroush, S.; Mohammadi-Yegane, S. Antimicrobial susceptibility patterns and distribution of blaOXA genes among *Acinetobacter* spp. Isolated from patients at Tehran hospitals. *Jpn. J. Infect. Dis.* **2008**, *61*, 274-278.
- (8) Mugnier, P.; Poirel, L.; Pitout, M.; Nordmann, P. Carbapenem-resistant and OXA-23-producing *Acinetobacter baumannii* isolates in the United Arab Emirates. *Clin. Microbiol. Infect.* **2008**, *14*, 879-882.
- (9) Wang, H.; Guo, P.; Sun, H.; Yang, Q.; Chen, M.; Xu, Y.; Zhu, Y. Molecular epidemiology of clinical isolates of carbapenem-resistant *Acinetobacter* spp. from Chinese hospitals. *Antimicrob. Agents Chemother.* **2007**, *51*, 4022-4028.
- (10) Koh, T. H.; Sng, L. H.; Wang, G. C.; Hsu, L. Y.; Zhao, Y. IMP-4 and OXA  $\beta$ -lactamases in *Acinetobacter baumannii* from Singapore. *J. Antimicrob. Chemother.* **2007**, *59*, 627-632.
- (11) Niumsup, P. R.; Boonkerd, N.; Tansawai, U.; Tiloklurs, M. Carbapenem-Resistant *Acinetobacter baumannii* Producing OXA-23 in Thailand. *Jpn. J. Infect. Dis.* **2009**, *62*, 152-154.
- (12) Kim, J. W.; Heo, S. T.; Jin, J. S.; Choi, C. H.; Lee, Y. C.; Jeong, Y. G.; Kim, S. J.; Lee, J. C. Characterization of *Acinetobacter baumannii* carrying bla(OXA-23), bla(PER-1) and armA in a Korean hospital. *Clin. Microbiol. Infect.* **2008**, *14*, 716-718.
- (13) Mendes, R. E.; Bell, J. M.; Turnidge, J. D.; Castanheira, M.; Jones, R. N. Emergence and widespread dissemination of OXA-23, -24/40 and -58 carbapenemases among *Acinetobacter* spp. in Asia-Pacific nations: report from the SENTRY Surveillance Program. *J. Antimicrob. Chemother.* **2009**, *63*, 55-59.

- (14) Le Hello, S.; Falcot, V.; Lacassin, F.; Baumann, F.; Nordmann, P.; Naas, T. Molecular epidemiology of carbapenem-resistant *Acinetobacter baumannii* in New Caledonia. *Clin. Microbiol. Infect.* **2008**, *14*, 977-981.
- (15) Carvalho, K. R.; Carvalho-Assef, A. P.; Peirano, G.; Santos, L. C.; Pereira, M. J.; Asensi, M. D. Dissemination of multidrug-resistant *Acinetobacter baumannii* genotypes carrying bla(OXA-23) collected from hospitals in Rio de Janeiro, Brazil. *Int. J. Antimicrob. Agents* **2009**.
- (16) Qi, C.; Malczynski, M.; Parker, M.; Scheetz, M. H. Characterization of genetic diversity of carbapenem-resistant *Acinetobacter baumannii* clinical strains collected from 2004 to 2007. *J. Clin. Microbiol.* **2008**, *46*, 1106-1109.
- (17) Bratu, S.; Landman, D.; Martin, D. A.; Georgescu, C.; Quale, J. Correlation of antimicrobial resistance with  $\beta$ -lactamases, the OmpA-like porin, and efflux pumps in clinical isolates of *Acinetobacter baumannii* endemic to New York City. *Antimicrob. Agents Chemother.* **2008**, *52*, 2999-3005.
- (18) Castanheira, M.; Mendes, R. E.; Rhomberg, P. R.; Jones, R. N. Rapid emergence of blaCTX-M among Enterobacteriaceae in U.S. Medical Centers: molecular evaluation from the MYSTIC Program (2007). *Microb. Drug Resist.* **2008**, *14*, 211-216.
- (19) Bou, G.; Oliver, A.; Martinez-Beltran, J. OXA-24, a novel class D  $\beta$ -lactamase with carbapenemase activity in an *Acinetobacter baumannii* clinical strain. *Antimicrob. Agents Chemother.* **2000**, *44*, 1556-1561.
- (20) D'Andrea, M. M.; Giani, T.; D'Arezzo, S.; Capone, A.; Petrosillo, N.; Visca, P.; Luzzaro, F.; Rossolini, G. M. Characterization of pABVA01, a Plasmid Encoding the OXA-24 Carbapenemase from Italian Isolates of *Acinetobacter baumannii*. *Antimicrob. Agents Chemother.* **2009**.
- (21) Quinteira, S.; Grosso, F.; Ramos, H.; Peixe, L. Molecular epidemiology of imipenem-resistant *Acinetobacter haemolyticus* and *Acinetobacter baumannii* isolates carrying plasmid-mediated OXA-40 from a Portuguese hospital. *Antimicrob. Agents Chemother.* **2007**, *51*, 3465-3466.
- (22) Sevillano, E.; Gallego, L.; Garcia-Lobo, J. M. First detection of the OXA-40 carbapenemase in *P. aeruginosa* isolates, located on a plasmid also found in *A. baumannii*. *Pathol. Biol. (Paris)* **2008**.
- (23) Poirel, L.; Heritier, C.; Tolun, V.; Nordmann, P. Emergence of oxacillinase-mediated resistance to imipenem in *Klebsiella pneumoniae*. *Antimicrob. Agents Chemother.* **2004**, *48*, 15-22.
- (24) Cuzon, G.; Naas, T.; Bogaerts, P.; Glupczynski, Y.; Huang, T. D.; Nordmann, P. Plasmid-encoded carbapenem-hydrolyzing  $\beta$ -lactamase OXA-48 in an imipenem-susceptible *Klebsiella pneumoniae* strain from Belgium. *Antimicrob. Agents Chemother.* **2008**, *52*, 3463-3464.
- (25) Brown, S.; Young, H. K.; Amyes, S. G. Characterisation of OXA-51, a novel class D carbapenemase found in genetically unrelated clinical strains of *Acinetobacter baumannii* from Argentina. *Clin. Microbiol. Infect.* **2005**, *11*, 15-23.
- (26) Song, J. Y.; Cheong, H. J.; Lee, J.; Sung, A. K.; Kim, W. J. Efficacy of monotherapy and combined antibiotic therapy for carbapenem-resistant *Acinetobacter baumannii* pneumonia in an immunosuppressed mouse model. *Int. J. Antimicrob. Agents* **2009**, *33*, 33-39.

- (27) Poirel, L.; Marque, S.; Heritier, C.; Segonds, C.; Chabanon, G.; Nordmann, P. OXA-58, a novel class D  $\beta$ -lactamase involved in resistance to carbapenems in *Acinetobacter baumannii*. *Antimicrob. Agents Chemother.* **2005**, *49*, 202-208.
- (28) Pasteran, F.; Rapoport, M.; Petroni, A.; Faccione, D.; Corso, A.; Galas, M.; Vazquez, M.; Procopio, A.; Tokumoto, M.; Cagnoni, V. Emergence of PER-2 and VEB-1a in *Acinetobacter baumannii* Strains in the Americas. *Antimicrob. Agents Chemother.* **2006**, *50*, 3222-3224.
- (29) Pournaras, S.; Markogiannakis, A.; Ikonomidis, A.; Kondyli, L.; Bethimouti, K.; Maniatis, A. N.; Legakis, N. J.; Tsakris, A. Outbreak of multiple clones of imipenem-resistant *Acinetobacter baumannii* isolates expressing OXA-58 carbapenemase in an intensive care unit. *J. Antimicrob. Chemother.* **2006**, *57*, 557-561.
- (30) Bertini, A.; Poirel, L.; Bernabeu, S.; Fortini, D.; Villa, L.; Nordmann, P.; Carattoli, A. Multicopy blaOXA-58 gene as a source of high-level resistance to carbapenems in *Acinetobacter baumannii*. *Antimicrob. Agents Chemother.* **2007**, *51*, 2324-2328.
- (31) Marti, S.; Sanchez-Cespedes, J.; Blasco, M. D.; Ruiz, M.; Espinal, P.; Alba, V.; Fernandez-Cuenca, F.; Pascual, A.; Vila, J. Characterization of the carbapenem-hydrolyzing oxacillinase oxa-58 in an *Acinetobacter* genospecies 3 clinical isolate. *Antimicrob. Agents Chemother.* **2008**, *52*, 2955-2958.
- (32) Zarrilli, R.; Vitale, D.; Di Popolo, A.; Bagattini, M.; Daoud, Z.; Khan, A. U.; Afif, C.; Triassi, M. A plasmid-borne blaOXA-58 gene confers imipenem resistance to *Acinetobacter baumannii* isolates from a Lebanese hospital. *Antimicrob. Agents Chemother.* **2008**, *52*, 4115-4120.
- (33) Huang, L. Y.; Chen, T. L.; Lu, P. L.; Tsai, C. A.; Cho, W. L.; Chang, F. Y.; Fung, C. P.; Siu, L. K. Dissemination of multidrug-resistant, class 1 integron-carrying *Acinetobacter baumannii* isolates in Taiwan. *Clin. Microbiol. Infect.* **2008**, *14*, 1010-1019.
- (34) Lee, K.; Kim, M. N.; Choi, T. Y.; Cho, S. E.; Lee, S.; Whang, D. H.; Yong, D.; Chong, Y.; Woodford, N.; Livermore, D. M. Wide dissemination of OXA-type carbapenemases in clinical *Acinetobacter* spp. isolates from South Korea. *Int. J. Antimicrob. Agents* **2009**, *33*, 520-524.
- (35) Zong, Z.; Lu, X.; Valenzuela, J. K.; Partridge, S. R.; Iredell, J. An outbreak of carbapenem-resistant *Acinetobacter baumannii* producing OXA-23 carbapenemase in western China. *Int. J. Antimicrob. Agents* **2008**, *31*, 50-54.
- (36) Hu, W. S.; Yao, S. M.; Fung, C. P.; Hsieh, Y. P.; Liu, C. P.; Lin, J. F. An OXA-66/OXA-51-like carbapenemase and possibly an efflux pump are associated with resistance to imipenem in *Acinetobacter baumannii*. *Antimicrob. Agents Chemother.* **2007**, *51*, 3844-3852.
- (37) Figueiredo, S.; Poirel, L.; Croize, J.; Recule, C.; Nordmann, P. In vivo selection of reduced susceptibility to carbapenems in *Acinetobacter baumannii* related to ISAba1-mediated overexpression of the natural bla(OXA-66) oxacillinase gene. *Antimicrob. Agents Chemother.* **2009**, *53*, 2657-2659.
- (38) Lu, P. L.; Doumith, M.; Livermore, D. M.; Chen, T. P.; Woodford, N. Diversity of carbapenem resistance mechanisms in *Acinetobacter baumannii* from a Taiwan hospital: spread of plasmid-borne OXA-72 carbapenemase. *J. Antimicrob. Chemother.* **2009**, *63*, 641-647.

- (39) Evans, B. A.; Brown, S.; Hamouda, A.; Findlay, J.; Amyes, S. G. Eleven novel OXA-51-like enzymes from clinical isolates of *Acinetobacter baumannii*. *Clin. Microbiol. Infect.* **2007**, *13*, 1137-1138.
- (40) Yigit, H.; Queenan, A. M.; Anderson, G. J.; Domenech-Sanchez, A.; Biddle, J. W.; Steward, C. D.; Alberti, S.; Bush, K.; Tenover, F. C. Novel carbapenem-hydrolyzing  $\beta$ -lactamase, KPC-1, from a carbapenem-resistant strain of *Klebsiella pneumoniae*. *Antimicrob. Agents Chemother.* **2001**, *45*, 1151-1161.
- (41) Smith Moland, E.; Hanson, N. D.; Herrera, V. L.; Black, J. A.; Lockhart, T. J.; Hossain, A.; Johnson, J. A.; Goering, R. V.; Thomson, K. S. Plasmid-mediated, carbapenem-hydrolyzing  $\beta$ -lactamase, KPC-2, in *Klebsiella pneumoniae* isolates. *J. Antimicrob. Chemother.* **2003**, *51*, 711-714.
- (42) Hossain, A.; Ferraro, M. J.; Pino, R. M.; Dew, R. B., 3rd; Moland, E. S.; Lockhart, T. J.; Thomson, K. S.; Goering, R. V.; Hanson, N. D. Plasmid-mediated carbapenem-hydrolyzing enzyme KPC-2 in an *Enterobacter* sp. *Antimicrob. Agents Chemother.* **2004**, *48*, 4438-4440.
- (43) Yigit, H.; Queenan, A. M.; Rasheed, J. K.; Biddle, J. W.; Domenech-Sanchez, A.; Alberti, S.; Bush, K.; Tenover, F. C. Carbapenem-resistant strain of *Klebsiella oxytoca* harboring carbapenem-hydrolyzing  $\beta$ -lactamase KPC-2. *Antimicrob. Agents Chemother.* **2003**, *47*, 3881-3889.
- (44) Bradford, P. A.; Bratu, S.; Urban, C.; Visalli, M.; Mariano, N.; Landman, D.; Rahal, J. J.; Brooks, S.; Cebular, S.; Quale, J. Emergence of carbapenem-resistant *Klebsiella* species possessing the class A carbapenem-hydrolyzing KPC-2 and inhibitor-resistant TEM-30  $\beta$ -lactamases in New York City. *Clin. Infect. Dis.* **2004**, *39*, 55-60.
- (45) Bratu, S.; Landman, D.; Alam, M.; Tolentino, E.; Quale, J. Detection of KPC carbapenem-hydrolyzing enzymes in *Enterobacter* spp. from Brooklyn, New York. *Antimicrob. Agents Chemother.* **2005**, *49*, 776-778.
- (46) Pope, J.; Adams, J.; Doi, Y.; Szabo, D.; Paterson, D. L. KPC type  $\beta$ -lactamase, rural Pennsylvania. *Emerg. Infect. Dis.* **2006**, *12*, 1613-1614.
- (47) Deshpande, L. M.; Rhomberg, P. R.; Sader, H. S.; Jones, R. N. Emergence of serine carbapenemases (KPC and SME) among clinical strains of Enterobacteriaceae isolated in the United States Medical Centers: report from the MYSTIC Program (1999-2005). *Diagn. Microbiol. Infect. Dis.* **2006**, *56*, 367-372.
- (48) Deshpande, L. M.; Jones, R. N.; Fritsche, T. R.; Sader, H. S. Occurrence and characterization of carbapenemase-producing Enterobacteriaceae: report from the SENTRY Antimicrobial Surveillance Program (2000-2004). *Microb. Drug Resist.* **2006**, *12*, 223-230.
- (49) Tibbetts, R.; Frye, J. G.; Marschall, J.; Warren, D.; Dunne, W. Detection of KPC-2 in a clinical isolate of proteus mirabilis and first reported description of carbapenemase resistance caused by a KPC  $\beta$ -lactamase in *P. mirabilis*. *J. Clin. Microbiol.* **2008**, *46*, 3080-3083.
- (50) Bennett, J. W.; Herrera, M. L.; Lewis, J. S., 2nd; Wickes, B. W.; Jorgensen, J. H. KPC-2-producing *Enterobacter cloacae* and *Pseudomonas putida* coinfection in a liver transplant recipient. *Antimicrob. Agents Chemother.* **2009**, *53*, 292-294.
- (51) Rasheed, J. K.; Biddle, J. W.; Anderson, K. F.; Washer, L.; Chenoweth, C.; Perrin, J.; Newton, D. W.; Patel, J. B. Detection of the *Klebsiella pneumoniae* carbapenemase type

- 2 Carbapenem-hydrolyzing enzyme in clinical isolates of *Citrobacter freundii* and *K. oxytoca* carrying a common plasmid. *J. Clin. Microbiol.* **2008**, *46*, 2066-2069.
- (52) Halstead, D. C.; Sellen, T. J.; Adams-Haduch, J. M.; Dossenback, D. A.; Abid, J.; Doi, Y.; Paterson, D. L. *Klebsiella pneumoniae* Carbapenemase-producing Enterobacteriaceae, Northeast Florida. *South. Med. J.* **2009**, *102*, 680-687.
- (53) Navon-Venezia, S.; Chmelnitsky, I.; Leavitt, A.; Schwaber, M. J.; Schwartz, D.; Carmeli, Y. Plasmid-mediated imipenem-hydrolyzing enzyme KPC-2 among multiple carbapenem-resistant *Escherichia coli* clones in Israel. *Antimicrob. Agents Chemother.* **2006**, *50*, 3098-3101.
- (54) Naas, T.; Nordmann, P.; Vedel, G.; Poyart, C. Plasmid-mediated carbapenem-hydrolyzing  $\beta$ -lactamase KPC in a *Klebsiella pneumoniae* isolate from France. *Antimicrob. Agents Chemother.* **2005**, *49*, 4423-4424.
- (55) Cuzon, G.; Naas, T.; Demachy, M. C.; Nordmann, P. Plasmid-mediated carbapenem-hydrolyzing  $\beta$ -lactamase KPC-2 in *Klebsiella pneumoniae* isolate from Greece. *Antimicrob. Agents Chemother.* **2008**, *52*, 796-797.
- (56) Samuelsen, O.; Naseer, U.; Tofteland, S.; Skutlaberg, D. H.; Onken, A.; Hjetland, R.; Sundsfjord, A.; Giske, C. G. Emergence of clonally related *Klebsiella pneumoniae* isolates of sequence type 258 producing plasmid-mediated KPC carbapenemase in Norway and Sweden. *J. Antimicrob. Chemother.* **2009**, *63*, 654-658.
- (57) Wei, Z. Q.; Du, X. X.; Yu, Y. S.; Shen, P.; Chen, Y. G.; Li, L. J. Plasmid-mediated KPC-2 in a *Klebsiella pneumoniae* isolate from China. *Antimicrob. Agents Chemother.* **2007**, *51*, 763-765.
- (58) Villegas, M. V.; Lolans, K.; Correa, A.; Kattan, J. N.; Lopez, J. A.; Quinn, J. P. First identification of *Pseudomonas aeruginosa* isolates producing a KPC-type carbapenem-hydrolyzing  $\beta$ -lactamase. *Antimicrob. Agents Chemother.* **2007**, *51*, 1553-1555.
- (59) Peirano, G.; Seki, L. M.; Val Passos, V. L.; Pinto, M. C.; Guerra, L. R.; Asensi, M. D. Carbapenem-hydrolyzing  $\beta$ -lactamase KPC-2 in *Klebsiella pneumoniae* isolated in Rio de Janeiro, Brazil. *J. Antimicrob. Chemother.* **2009**, *63*, 265-268.
- (60) Roche, C.; Cotter, M.; N, O. C.; Crowley, B. First identification of class A carbapenemase-producing *Klebsiella pneumoniae* in the Republic of Ireland. *Euro Surveill.* **2009**, *14*.
- (61) Goldfarb, D.; Harvey, S. B.; Jessamine, K.; Jessamine, P.; Toye, B.; Desjardins, M. Detection of plasmid-mediated KPC-producing *Klebsiella pneumoniae* in Ottawa, Canada: evidence of intrahospital transmission. *J. Clin. Microbiol.* **2009**, *47*, 1920-1922.
- (62) Akpaka, P. E.; Swanston, W. H.; Ihemere, H. N.; Correa, A.; Torres, J. A.; Tafur, J. D.; Montealegre, M. C.; Quinn, J. P.; Villegas, M. V. Emergence of KPC Producing *Pseudomonas aeruginosa* in Trinidad & Tobago. *J. Clin. Microbiol.* **2009**.
- (63) Woodford, N.; Tierno, P. M., Jr.; Young, K.; Tysall, L.; Palepou, M. F.; Ward, E.; Painter, R. E.; Suber, D. F.; Shungu, D.; Silver, L. L.; Inglima, K.; Kornblum, J.; Livermore, D. M. Outbreak of *Klebsiella pneumoniae* producing a new carbapenem-hydrolyzing class A  $\beta$ -lactamase, KPC-3, in a New York Medical Center. *Antimicrob. Agents Chemother.* **2004**, *48*, 4793-4799.
- (64) Alba, J.; Ishii, Y.; Thomson, K.; Moland, E. S.; Yamaguchi, K. Kinetics study of KPC-3, a plasmid-encoded class A carbapenem-hydrolyzing  $\beta$ -lactamase. *Antimicrob. Agents Chemother.* **2005**, *49*, 4760-4762.

- (65) Endimiani, A.; Carias, L. L.; Hujer, A. M.; Bethel, C. R.; Hujer, K. M.; Perez, F.; Hutton, R. A.; Fox, W. R.; Hall, G. S.; Jacobs, M. R.; Paterson, D. L.; Rice, L. B.; Jenkins, S. G.; Tenover, F. C.; Bonomo, R. A. Presence of plasmid-mediated quinolone resistance in *Klebsiella pneumoniae* isolates possessing blaKPC in the United States. *Antimicrob. Agents Chemother.* **2008**, *52*, 2680-2682.
- (66) Le, J.; Castanheira, M.; Burgess, D. S.; McKee, B.; Iqbal, R.; Jones, R. N. Clonal Dissemination of *Klebsiella pneumoniae* Carbapenemase KPC-3 in Long Beach, California. *J. Clin. Microbiol.* **2009**, *in print*.
- (67) Leavitt, A.; Navon-Venezia, S.; Chmelnitsky, I.; Schwaber, M. J.; Carmeli, Y. Emergence of KPC-2 and KPC-3 in carbapenem-resistant *Klebsiella pneumoniae* strains in an Israeli hospital. *Antimicrob. Agents Chemother.* **2007**, *51*, 3026-3029.
- (68) Woodford, N.; Zhang, J.; Warner, M.; Kaufmann, M. E.; Matos, J.; Macdonald, A.; Brudney, D.; Sompolinsky, D.; Navon-Venezia, S.; Livermore, D. M. Arrival of *Klebsiella pneumoniae* producing KPC carbapenemase in the United Kingdom. *J. Antimicrob. Chemother.* **2008**, *62*, 1261-1264.
- (69) Wolter, D. J.; Kurpiel, P. M.; Woodford, N.; Palepou, M. F.; Goering, R. V.; Hanson, N. D. Phenotypic and enzymatic comparative analysis of the novel KPC variant KPC-5 and its evolutionary variants, KPC-2 and KPC-4. *Antimicrob. Agents Chemother.* **2009**, *53*, 557-562.
- (70) Osano, E.; Arakawa, Y.; Wacharotayankun, R.; Ohta, M.; Horii, T.; Ito, H.; Yoshimura, F.; Kato, N. Molecular characterization of an enterobacterial metallo  $\beta$ -lactamase found in a clinical isolate of *Serratia marcescens* that shows imipenem resistance. *Antimicrob. Agents Chemother.* **1994**, *38*, 71-78.
- (71) Senda, K.; Arakawa, Y.; Ichiyama, S.; Nakashima, K.; Ito, H.; Ohsuka, S.; Shimokata, K.; Kato, N.; Ohta, M. PCR detection of metallo- $\beta$ -lactamase gene (blaIMP) in gram-negative rods resistant to broad-spectrum  $\beta$ -lactams. *J. Clin. Microbiol.* **1996**, *34*, 2909-2913.
- (72) Oh, E. J.; Lee, S.; Park, Y. J.; Park, J. J.; Park, K.; Kim, S. I.; Kang, M. W.; Kim, B. K. Prevalence of metallo- $\beta$ -lactamase among *Pseudomonas aeruginosa* and *Acinetobacter baumannii* in a Korean university hospital and comparison of screening methods for detecting metallo- $\beta$ -lactamase. *J. Microbiol. Methods* **2003**, *54*, 411-418.
- (73) Koh, T. H.; Babini, G. S.; Woodford, N.; Sng, L. H.; Hall, L. M.; Livermore, D. M. Carbapenem-hydrolysing IMP-1  $\beta$ -lactamase in *Klebsiella pneumoniae* from Singapore. *Lancet* **1999**, *353*, 2162.
- (74) Wang, C. X.; Mi, Z. H. IMP-1 metallo- $\beta$ -lactamase-producing *Pseudomonas aeruginosa* in a university hospital in the People's Republic of China. *J. Antimicrob. Chemother.* **2004**, *54*, 1159-1160.
- (75) Liu, S. Y.; Lin, J. Y.; Chu, C.; Su, L. H.; Lin, T. Y.; Chiu, C. H. Integron-associated imipenem resistance in *Acinetobacter baumannii* isolated from a regional hospital in Taiwan. *Int. J. Antimicrob. Agents* **2006**, *27*, 81-84.
- (76) Aktas, Z.; Bal, C.; Midilli, K.; Poirel, L.; Nordmann, P. First IMP-1-producing *Klebsiella pneumoniae* isolate in Turkey. *Clin. Microbiol. Infect.* **2006**, *12*, 695-696.
- (77) Daoud, Z.; Hobeika, E.; Choucair, A.; Rohban, R. Isolation of the first metallo- $\beta$ -lactamase producing *Klebsiella pneumoniae* in Lebanon. *Rev. Esp. Quimioter.* **2008**, *21*, 123-126.

- (78) Cornaglia, G.; Riccio, M. L.; Mazzariol, A.; Lauretti, L.; Fontana, R.; Rossolini, G. M. Appearance of IMP-1 metallo- $\beta$ -lactamase in Europe. *Lancet* **1999**, *353*, 899-900.
- (79) Tysall, L.; Stockdale, M. W.; Chadwick, P. R.; Palepou, M. F.; Towner, K. J.; Livermore, D. M.; Woodford, N. IMP-1 carbapenemase detected in an *Acinetobacter* clinical isolate from the UK. *J. Antimicrob. Chemother.* **2002**, *49*, 217-218.
- (80) Castanheira, M.; Sader, H. S.; Deshpande, L. M.; Fritsche, T. R.; Jones, R. N. Antimicrobial activities of tigecycline and other broad-spectrum antimicrobials tested against serine carbapenemase- and metallo- $\beta$ -lactamase-producing Enterobacteriaceae: report from the SENTRY Antimicrobial Surveillance Program. *Antimicrob. Agents Chemother.* **2008**, *52*, 570-573.
- (81) Biendo, M.; Canarelli, B.; Thomas, D.; Rousseau, F.; Hamdad, F.; Adjide, C.; Laurans, G.; Eb, F. Successive emergence of extended-spectrum  $\beta$ -lactamase-producing and carbapenemase-producing *Enterobacter aerogenes* isolates in a university hospital. *J. Clin. Microbiol.* **2008**, *46*, 1037-1044.
- (82) Lincopan, N.; McCulloch, J. A.; Reinert, C.; Cassettari, V. C.; Gales, A. C.; Mamizuka, E. M. First isolation of metallo- $\beta$ -lactamase-producing multiresistant *Klebsiella pneumoniae* from a patient in Brazil. *J Clin. Microbiol.* **2005**, *43*, 516-519.
- (83) Riccio, M. L.; Franceschini, N.; Boschi, L.; Caravelli, B.; Cornaglia, G.; Fontana, R.; Amicosante, G.; Rossolini, G. M. Characterization of the metallo- $\beta$ -lactamase determinant of *Acinetobacter baumannii* AC-54/97 reveals the existence of bla(IMP) allelic variants carried by gene cassettes of different phylogeny. *Antimicrob. Agents Chemother.* **2000**, *44*, 1229-1235.
- (84) Laraki, N.; Galleni, M.; Thamm, I.; Riccio, M. L.; Amicosante, G.; Frere, J. M.; Rossolini, G. M. Structure of In31, a blaIMP-containing *Pseudomonas aeruginosa* integron phyletically related to In5, which carries an unusual array of gene cassettes. *Antimicrob. Agents Chemother.* **1999**, *43*, 890-901.
- (85) Yano, H.; Kuga, A.; Okamoto, R.; Kitasato, H.; Kobayashi, T.; Inoue, M. Plasmid-encoded metallo- $\beta$ -lactamase (IMP-6) conferring resistance to carbapenems, especially meropenem. *Antimicrob. Agents Chemother.* **2001**, *45*, 1343-1348.
- (86) O'Hara, K.; Haruta, S.; Sawai, T.; Tsunoda, M.; Iyobe, S. Novel metallo  $\beta$ -lactamase mediated by a *Shigella flexneri* plasmid. *FEMS Microbiol. Lett.* **1998**, *162*, 201-206.
- (87) Iyobe, S.; Kusadokoro, H.; Takahashi, A.; Yomoda, S.; Okubo, T.; Nakamura, A.; O'Hara, K. Detection of a variant metallo- $\beta$ -lactamase, IMP-10, from two unrelated strains of *Pseudomonas aeruginosa* and an *Alcaligenes xylosoxidans* strain. *Antimicrob. Agents Chemother.* **2002**, *46*, 2014-2016.
- (88) Iyobe, S.; Kusadokoro, H.; Ozaki, J.; Matsumura, N.; Minami, S.; Haruta, S.; Sawai, T.; O'Hara, K. Amino acid substitutions in a variant of IMP-1 metallo- $\beta$ -lactamase. *Antimicrob. Agents Chemother.* **2000**, *44*, 2023-2027.
- (89) Oelschlaeger, P.; Mayo, S. L.; Pleiss, J. Impact of remote mutations on metallo- $\beta$ -lactamase substrate specificity: implications for the evolution of antibiotic resistance. *Protein Sci.* **2005**, *14*, 765-774.
- (90) Ryoo, N. H.; Lee, K.; Lim, J. B.; Lee, Y. H.; Bae, I. K.; Jeong, S. H. Outbreak by meropenem-resistant *Pseudomonas aeruginosa* producing IMP-6 metallo- $\beta$ -lactamase in a Korean hospital. *Diagn. Microbiol. Infect. Dis.* **2009**, *63*, 115-117.

- (91) Shinoda, Y.; Tomita, A.; Itaya, K.; Chen, G.; Wakuta, R.; Fukuchi, K.; Gomi, K. Analysis of the metallo- $\beta$ -lactamase gene in multidrug-resistant *Pseudomonas aeruginosa* isolated at Showa University Hospital. *Rinsho Byori* **2006**, *54*, 699-705.
- (92) Hu, Z.; Zhao, W. H. Identification of plasmid- and integron-borne blaIMP-1 and blaIMP-10 in clinical isolates of *Serratia marcescens*. *J. Med. Microbiol.* **2009**, *58*, 217-221.
- (93) Neuwirth, C.; Siebor, E.; Robin, F.; Bonnet, R. First occurrence of an IMP metallo- $\beta$ -lactamase in *Aeromonas caviae*: IMP-19 in an isolate from France. *Antimicrob. Agents Chemother.* **2007**, *51*, 4486-4488.
- (94) Concha, N. O.; Janson, C. A.; Rowling, P.; Pearson, S.; Cheever, C. A.; Clarke, B. P.; Lewis, C.; Galleni, M.; Frere, J. M.; Payne, D. J.; Bateson, J. H.; Abdel-Meguid, S. S. Crystal structure of the IMP-1 metallo  $\beta$ -lactamase from *Pseudomonas aeruginosa* and its complex with a mercaptocarboxylate inhibitor: binding determinants of a potent, broad-spectrum inhibitor. *Biochemistry* **2000**, *39*, 4288-4298.
- (95) Yan, J. J.; Ko, W. C.; Wu, J. J. Identification of a plasmid encoding SHV-12, TEM-1, and a variant of IMP-2 metallo- $\beta$ -lactamase, IMP-8, from a clinical isolate of *Klebsiella pneumoniae*. *Antimicrob. Agents Chemother.* **2001**, *45*, 2368-2371.
- (96) Yan, J. J.; Ko, W. C.; Chuang, C. L.; Wu, J. J. Metallo- $\beta$ -lactamase-producing Enterobacteriaceae isolates in a university hospital in Taiwan: prevalence of IMP-8 in *Enterobacter cloacae* and first identification of VIM-2 in *Citrobacter freundii*. *J. Antimicrob. Chemother.* **2002**, *50*, 503-511.
- (97) Wang, H.; Guo, P.; Sun, H.; Yang, Q.; Chen, M.; Xu, Y.; Zhu, Y. Molecular epidemiology of clinical isolates of carbapenem-resistant *Acinetobacter* spp. from Chinese hospitals. *Antimicrob Agents Chemother* **2007**, *51*, 4022-4028.
- (98) Xiong, J.; Hynes, M. F.; Ye, H.; Chen, H.; Yang, Y.; M'Zali, F.; Hawkey, P. M. bla(IMP-9) and its association with large plasmids carried by *Pseudomonas aeruginosa* isolates from the People's Republic of China. *Antimicrob. Agents Chemother.* **2006**, *50*, 355-358.
- (99) Chu, Y. W.; Afzal-Shah, M.; Houang, E. T.; Palepou, M. I.; Lyon, D. J.; Woodford, N.; Livermore, D. M. IMP-4, a novel metallo- $\beta$ -lactamase from nosocomial *Acinetobacter* spp. collected in Hong Kong between 1994 and 1998. *Antimicrob. Agents Chemother.* **2001**, *45*, 710-714.
- (100) Hawkey, P. M.; Xiong, J.; Ye, H.; Li, H.; M'Zali, F. H. Occurrence of a new metallo- $\beta$ -lactamase IMP-4 carried on a conjugative plasmid in *Citrobacter youngae* from the People's Republic of China. *FEMS Microbiol. Lett.* **2001**, *194*, 53-57.
- (101) Peleg, A. Y.; Franklin, C.; Bell, J.; Spelman, D. W. Emergence of IMP-4 metallo- $\beta$ -lactamase in a clinical isolate from Australia. *J. Antimicrob. Chemother.* **2004**, *54*, 699-700.
- (102) Peleg, A. Y.; Franklin, C.; Bell, J. M.; Spelman, D. W. Dissemination of the metallo- $\beta$ -lactamase gene blaIMP-4 among gram-negative pathogens in a clinical setting in Australia. *Clin. Infect. Dis.* **2005**, *41*, 1549-1556.
- (103) Peleg, A. Y.; Franklin, C.; Walters, L. J.; Bell, J. M.; Spelman, D. W. OXA-58 and IMP-4 carbapenem-hydrolyzing  $\beta$ -lactamases in an *Acinetobacter junii* blood culture isolate from Australia. *Antimicrob. Agents Chemother.* **2006**, *50*, 399-400.
- (104) Espedido, B.; Iredell, J.; Thomas, L.; Zelynski, A. Wide dissemination of a carbapenemase plasmid among gram-negative bacteria: implications of the variable phenotype. *J. Clin. Microbiol.* **2005**, *43*, 4918-4919.



- (105) Bert, F.; Vanjak, D.; Leflon-Guibout, V.; Mrejen, S.; Delpierre, S.; Redondo, A.; Nicolas-Chanoine, M. H. IMP-4-producing *Pseudomonas aeruginosa* in a French patient repatriated from Malaysia: impact of early detection and control measures. *Clin. Infect. Dis.* **2007**, *44*, 764-765.
- (106) Mendes, R. E.; Bell, J. M.; Turnidge, J. D.; Yang, Q.; Yu, Y.; Sun, Z.; Jones, R. N. Carbapenem-resistant isolates of *Klebsiella pneumoniae* in China and detection of a conjugative plasmid (blaKPC-2 plus qnrB4) and a blaIMP-4 gene. *Antimicrob. Agents Chemother.* **2008**, *52*, 798-799.
- (107) Hwa, W. E.; Subramaniam, G.; Navaratnam, P.; Sekaran, S. D. Detection and characterization of class 1 integrons among carbapenem-resistant isolates of *Acinetobacter* spp. in Malaysia. *J. Microbiol. Immunol. Infect.* **2009**, *42*, 54-62.
- (108) Da Silva, G. J.; Correia, M.; Vital, C.; Ribeiro, G.; Sousa, J. C.; Leitao, R.; Peixe, L.; Duarte, A. Molecular characterization of bla(IMP-5), a new integron-borne metallo- $\beta$ -lactamase gene from an *Acinetobacter baumannii* nosocomial isolate in Portugal. *FEMS Microbiol. Lett.* **2002**, *215*, 33-39.
- (109) Brizio, A.; Conceicao, T.; Pimentel, M.; Da Silva, G.; Duarte, A. High-level expression of IMP-5 carbapenemase owing to point mutation in the -35 promoter region of class 1 integron among *Pseudomonas aeruginosa* clinical isolates. *Int. J. Antimicrob. Agents* **2006**, *27*, 27-31.
- (110) Gibb, A. P.; Tribuddharat, C.; Moore, R. A.; Louie, T. J.; Krulicki, W.; Livermore, D. M.; Palepou, M. F.; Woodford, N. Nosocomial outbreak of carbapenem-resistant *Pseudomonas aeruginosa* with a new bla(IMP) allele, bla(IMP-7). *Antimicrob. Agents Chemother.* **2002**, *46*, 255-258.
- (111) Ho, S. E.; Subramaniam, G.; Palasubramaniam, S.; Navaratnam, P. Carbapenem-resistant *Pseudomonas aeruginosa* in Malaysia producing IMP-7  $\beta$ -lactamase. *Antimicrob. Agents Chemother.* **2002**, *46*, 3286-3287.
- (112) Ohlasova, D.; Kmet, V.; Niks, M. First report of the carbapenem-resistant *Pseudomonas aeruginosa* producing IMP-7 metallo- $\beta$ -lactamase in Slovakia. *Int. J. Antimicrob. Agents* **2007**, *30*, 370-371.
- (113) Kouda, S.; Kuwahara, R.; Ohara, M.; Shigeta, M.; Fujiwara, T.; Komatsuzawa, H.; Usui, T.; Sugai, M. First isolation of blaIMP-7 in a *Pseudomonas aeruginosa* in Japan. *J. Infect. Chemother.* **2007**, *13*, 276-277.
- (114) Hrabak, J.; Fridrichova, M.; Stolbova, M.; Bergerova, T.; Zemlickova, H.; Urbaskova, P. First identification of metallo- $\beta$ -lactamase-producing *Pseudomonas aeruginosa* in the Czech Republic. *Euro Surveill.* **2009**, *14*.
- (115) Docquier, J. D.; Riccio, M. L.; Mugnaioli, C.; Luzzaro, F.; Endimiani, A.; Toniolo, A.; Amicosante, G.; Rossolini, G. M. IMP-12, a new plasmid-encoded metallo- $\beta$ -lactamase from a *Pseudomonas putida* clinical isolate. *Antimicrob. Agents Chemother.* **2003**, *47*, 1522-1528.
- (116) Toleman, M. A.; Biedenbach, D.; Bennett, D.; Jones, R. N.; Walsh, T. R. Genetic characterization of a novel metallo- $\beta$ -lactamase gene, blaIMP-13, harboured by a novel Tn5051-type transposon disseminating carbapenemase genes in Europe: report from the SENTRY worldwide antimicrobial surveillance programme. *J. Antimicrob. Chemother.* **2003**, *52*, 583-590.
- (117) Pagani, L.; Colinon, C.; Migliavacca, R.; Labonia, M.; Docquier, J. D.; Nucleo, E.; Spalla, M.; Li Bergoli, M.; Rossolini, G. M. Nosocomial outbreak caused by multidrug-

- resistant *Pseudomonas aeruginosa* producing IMP-13 metallo- $\beta$ -lactamase. *J. Clin. Microbiol.* **2005**, *43*, 3824-3828.
- (118) O'Mahony, R.; Quinn, T.; Drudy, D.; Walsh, C.; Whyte, P.; Mattar, S.; Fanning, S. Antimicrobial resistance in nontyphoidal *Salmonella* from food sources in Colombia: evidence for an unusual plasmid-localized class 1 integron in serotypes Typhimurium and Anatum. *Microb. Drug Resist.* **2006**, *12*, 269-277.
- (119) Mereuta, A. I.; Docquier, J. D.; Rossolini, G. M.; Buiuc, D. Detection of metallo- $\beta$ -lactamases in gram-negative bacilli isolated in hospitals from Romania--research fellowship report. *Bacteriol. Virusol. Parazitol. Epidemiol.* **2007**, *52*, 45-49.
- (120) Cejas, D.; Almuzara, M.; Santella, G.; Tuduri, A.; Palombarani, S.; Figueroa, S.; Gutkind, G.; Radice, M. Phenotypic and genotypic characterization of imipenem-resistant *Pseudomonas aeruginosa* isolated in a Buenos Aires hospital. *Rev. Argent. Microbiol.* **2008**, *40*, 238-245.
- (121) Duljasz, W.; Gniadkowski, M.; Sitter, S.; Wojna, A.; Jebelean, C. First organisms with acquired metallo- $\beta$ -lactamases (IMP-13, IMP-22, and VIM-2) reported in Austria. *Antimicrob. Agents Chemother.* **2009**, *53*, 2221-2222.
- (122) Martin, C. A.; Morita, K.; Ribes, J. A.; Deshpande, L. M.; Sader, H. S.; Castanheira, M. IMP-15-producing *Pseudomonas aeruginosa* strain isolated in a U.S. medical center: a recent arrival from Mexico. *Antimicrob. Agents Chemother.* **2008**, *52*, 2289-2290.
- (123) Garza-Ramos, U.; Morfin-Otero, R.; Sader, H. S.; Jones, R. N.; Hernandez, E.; Rodriguez-Noriega, E.; Sanchez, A.; Carrillo, B.; Esparza-Ahumada, S.; Silva-Sanchez, J. Metallo- $\beta$ -lactamase gene bla(IMP-15) in a class 1 integron, In95, from *Pseudomonas aeruginosa* clinical isolates from a hospital in Mexico. *Antimicrob. Agents Chemother.* **2008**, *52*, 2943-2946.
- (124) Quinones-Falconi, F.; Galicia-Velasco, M.; Marchiaro, P.; Mussi, M. A.; Ballerini, V.; Vila, A. J.; Viale, A. M.; Bermejo-Morales, K.; Limansky, A. S. Emergence of *Pseudomonas aeruginosa* strains producing metallo- $\beta$ -lactamases of the IMP-15 and VIM-2 types in Mexico. *Clin. Microbiol. Infect.* **2009**, *16*, 126-131.
- (125) Mendes, R. E.; Toleman, M. A.; Ribeiro, J.; Sader, H. S.; Jones, R. N.; Walsh, T. R. Integron carrying a novel metallo- $\beta$ -lactamase gene, blaIMP-16, and a fused form of aminoglycoside-resistant gene aac(6')-30/aac(6')-Ib': report from the SENTRY Antimicrobial Surveillance Program. *Antimicrob. Agents Chemother.* **2004**, *48*, 4693-4702.
- (126) Jacoby, G.; Bush, K. Amino Acid Sequences for TEM, SHV and OXA Extended-Spectrum and Inhibitor Resistant  $\beta$ -Lactamases.  
<http://www.lahey.org/Studies/other.asp#table1>
- (127) Hanson, N. D.; Hossain, A.; Buck, L.; Moland, E. S.; Thomson, K. S. First occurrence of a *Pseudomonas aeruginosa* isolate in the United States producing an IMP metallo- $\beta$ -lactamase, IMP-18. *Antimicrob. Agents Chemother.* **2006**, *50*, 2272-2273.
- (128) Garza-Ramos, U.; Tinoco, P.; Silva-Sanchez, J.; Morfin-Otero, R.; Rodriguez-Noriega, E.; Leon-Garnica, G.; Sader, H. S.; Jones, R. N. Metallo- $\beta$ -lactamase IMP-18 is located in a class 1 integron (In96) in a clinical isolate of *Pseudomonas aeruginosa* from Mexico. *Int. J. Antimicrob. Agents* **2008**, *31*, 78-80.
- (129) Wolter, D. J.; Khalaf, N.; Robledo, I. E.; Vazquez, G. J.; Sante, M. I.; Aquino, E. E.; Goering, R. V.; Hanson, N. D. Surveillance of carbapenem-resistant *Pseudomonas*

- aeruginosa* isolates from Puerto Rican Medical Center Hospitals: dissemination of KPC and IMP-18  $\beta$ -lactamases. *Antimicrob. Agents Chemother.* **2009**, *53*, 1660-1664.
- (130) Pellegrini, C.; Mercuri, P. S.; Celenza, G.; Galleni, M.; Segatore, B.; Sacchetti, E.; Volpe, R.; Amicosante, G.; Perilli, M. Identification of bla(IMP-22) in *Pseudomonas* spp. in urban wastewater and nosocomial environments: biochemical characterization of a new IMP metallo-enzyme variant and its genetic location. *J. Antimicrob. Chemother.* **2009**, *63*, 901-908.
- (131) Tsakris, A.; Pournaras, S.; Woodford, N.; Palepou, M. F.; Babini, G. S.; Douboyas, J.; Livermore, D. M. Outbreak of infections caused by *Pseudomonas aeruginosa* producing VIM-1 carbapenemase in Greece. *J. Clin. Microbiol.* **2000**, *38*, 1290-1292.
- (132) Tortola, M. T.; Lavilla, S.; Miro, E.; Gonzalez, J. J.; Larrosa, N.; Sabate, M.; Navarro, F.; Prats, G. First detection of a carbapenem-hydrolyzing metalloenzyme in two enterobacteriaceae isolates in Spain. *Antimicrob. Agents Chemother.* **2005**, *49*, 3492-3494.
- (133) Kassis-Chikhani, N.; Decre, D.; Gautier, V.; Burghoffer, B.; Saliba, F.; Mathieu, D.; Samuel, D.; Castaing, D.; Petit, J. C.; Dussaix, E.; Arlet, G. First outbreak of multidrug-resistant *Klebsiella pneumoniae* carrying blaVIM-1 and blaSHV-5 in a French university hospital. *J. Antimicrob. Chemother.* **2006**, *57*, 142-145.
- (134) Weile, J.; Rahmig, H.; Gfroer, S.; Schroepel, K.; Knabbe, C.; Susa, M. First detection of a VIM-1 metallo- $\beta$ -lactamase in a carbapenem-resistant *Citrobacter freundii* clinical isolate in an acute hospital in Germany. *Scand. J. Infect. Dis.* **2007**, *39*, 264-266.
- (135) Yildirim, I.; Ceyhan, M.; Gur, D.; Mugnaioli, C.; Rossolini, G. M. First detection of VIM-1 type metallo- $\beta$ -lactamase in a multidrug-resistant *Klebsiella pneumoniae* clinical isolate from Turkey also producing the CTX-M-15 extended-spectrum  $\beta$ -lactamase. *J. Chemother.* **2007**, *19*, 467-468.
- (136) Galani, I.; Souli, M.; Chryssouli, Z.; Orlandou, K.; Giamarellou, H. Characterization of a new integron containing bla(VIM-1) and aac(6')-IIc in an *Enterobacter cloacae* clinical isolate from Greece. *J. Antimicrob. Chemother.* **2005**, *55*, 634-638.
- (137) Tsakris, A.; Ikonomidis, A.; Pournaras, S.; Tzouvelekis, L. S.; Sofianou, D.; Legakis, N. J.; Maniatis, A. N. VIM-1 metallo- $\beta$ -lactamase in *Acinetobacter baumannii*. *Emerg. Infect. Dis.* **2006**, *12*, 981-983.
- (138) Aschbacher, R.; Doumith, M.; Livermore, D. M.; Larcher, C.; Woodford, N. Linkage of acquired quinolone resistance (qnrS1) and metallo- $\beta$ -lactamase (blaVIM-1) genes in multiple species of Enterobacteriaceae from Bolzano, Italy. *J. Antimicrob. Chemother.* **2008**, *61*, 515-523.
- (139) Miriagou, V.; Tzouvelekis, L. S.; Flevari, K.; Tsakiri, M.; Douzinas, E. E. *Providencia stuartii* with VIM-1 metallo- $\beta$ -lactamase. *J. Antimicrob. Chemother.* **2007**, *60*, 183-184.
- (140) Miriagou, V.; Douzinas, E. E.; Papagiannitsis, C. C.; Piperaki, E.; Legakis, N. J.; Tzouvelekis, L. S. Emergence of *Serratia liquefaciens* and *Klebsiella oxytoca* with metallo- $\beta$ -lactamase-encoding IncW plasmids: further spread of the blaVIM-1-carrying integron In-e541. *Int. J. Antimicrob. Agents* **2008**, *32*, 540-541.
- (141) Poirel, L.; Naas, T.; Nicolas, D.; Collet, L.; Bellais, S.; Cavallo, J. D.; Nordmann, P. Characterization of VIM-2, a carbapenem-hydrolyzing metallo- $\beta$ -lactamase and its plasmid- and integron-borne gene from a *Pseudomonas aeruginosa* clinical isolate in France. *Antimicrob. Agents Chemother.* **2000**, *44*, 891-897.

- (142) Samuelsen, O.; Castanheira, M.; Walsh, T. R.; Spencer, J. Kinetic characterization of VIM-7, a divergent member of the VIM metallo- $\beta$ -lactamase family. *Antimicrob. Agents Chemother.* **2008**, *52*, 2905-2908.
- (143) Mavroidi, A.; Tsakris, A.; Tzelepi, E.; Pournaras, S.; Loukova, V.; Tzouveleakis, L. S. Carbapenem-hydrolysing VIM-2 metallo- $\beta$ -lactamase in *Pseudomonas aeruginosa* from Greece. *J. Antimicrob. Chemother.* **2000**, *46*, 1041-1042.
- (144) Cardoso, O.; Leitao, R.; Figueiredo, A.; Sousa, J. C.; Duarte, A.; Peixe, L. V. Metallo- $\beta$ -lactamase VIM-2 in clinical isolates of *Pseudomonas aeruginosa* from Portugal. *Microb. Drug Resist.* **2002**, *8*, 93-97.
- (145) Walsh, T. R.; Toleman, M. A.; Hryniewicz, W.; Bennett, P. M.; Jones, R. N. Evolution of an integron carrying blaVIM-2 in Eastern Europe: report from the SENTRY Antimicrobial Surveillance Program. *J. Antimicrob. Chemother.* **2003**, *52*, 116-119.
- (146) Sardelic, S.; Pallecchi, L.; Punda-Polic, V.; Rossolini, G. M. Carbapenem-resistant *Pseudomonas aeruginosa*-carrying VIM-2 metallo- $\beta$ -lactamase determinants, Croatia. *Emerg. Infect. Dis.* **2003**, *9*, 1022-1023.
- (147) Lagatolla, C.; Tonin, E. A.; Monti-Bragadin, C.; Dolzani, L.; Gombac, F.; Bearzi, C.; Edalucci, E.; Gionchetti, F.; Rossolini, G. M. Endemic carbapenem-resistant *Pseudomonas aeruginosa* with acquired metallo- $\beta$ -lactamase determinants in European hospital. *Emerg. Infect. Dis.* **2004**, *10*, 535-538.
- (148) Henrichfreise, B.; Wiegand, I.; Sherwood, K. J.; Wiedemann, B. Detection of VIM-2 metallo- $\beta$ -lactamase in *Pseudomonas aeruginosa* from Germany. *Antimicrob. Agents Chemother.* **2005**, *49*, 1668-1669.
- (149) Canduela, M. J.; Gallego, L.; Sevillano, E.; Valderrey, C.; Calvo, F.; Perez, J. Evolution of multidrug-resistant *Acinetobacter baumannii* isolates obtained from elderly patients with respiratory tract infections. *J. Antimicrob. Chemother.* **2006**, *57*, 1220-1222.
- (150) Deplano, A.; Rodriguez-Villalobos, H.; Glupczynski, Y.; Bogaerts, P.; Allemeersch, D.; Grimmelprez, A.; Mascart, G.; Berges, L.; Byl, B.; Laurent, C.; Struelens, M. J. Emergence and dissemination of multidrug resistant clones of *Pseudomonas aeruginosa* producing VIM-2 metallo- $\beta$ -lactamase in Belgium. *Euro Surveill.* **2007**, *12*, E070118 070112.
- (151) Libisch, B.; Watine, J.; Balogh, B.; Gacs, M.; Muzslay, M.; Szabo, G.; Fuzi, M. Molecular typing indicates an important role for two international clonal complexes in dissemination of VIM-producing *Pseudomonas aeruginosa* clinical isolates in Hungary. *Res. Microbiol.* **2008**, *159*, 162-168.
- (152) Livermore, D. M.; Hope, R.; Brick, G.; Lillie, M.; Reynolds, R. Non-susceptibility trends among *Pseudomonas aeruginosa* and other non-fermentative Gram-negative bacteria from bacteraemias in the UK and Ireland, 2001-06. *J. Antimicrob. Chemother.* **2008**, *62* Suppl 2, ii55-63.
- (153) Lepsanovic, Z.; Libisch, B.; Tomanovic, B.; Nonkovici, Z.; Balogh, B.; Fuzi, M. Characterisation of the first VIM metallo- $\beta$ -lactamase-producing *Pseudomonas aeruginosa* clinical isolate in Serbia. *Acta Microbiol. Immunol. Hung.* **2008**, *55*, 447-454.
- (154) Lee, K.; Lim, J. B.; Yum, J. H.; Yong, D.; Chong, Y.; Kim, J. M.; Livermore, D. M. bla(VIM-2) cassette-containing novel integrons in metallo- $\beta$ -lactamase-producing *Pseudomonas aeruginosa* and *Pseudomonas putida* isolates disseminated in a Korean hospital. *Antimicrob. Agents Chemother.* **2002**, *46*, 1053-1058.

- (155) Shibata, N.; Doi, Y.; Yamane, K.; Yagi, T.; Kurokawa, H.; Shibayama, K.; Kato, H.; Kai, K.; Arakawa, Y. PCR typing of genetic determinants for metallo- $\beta$ -lactamases and integrases carried by gram-negative bacteria isolated in Japan, with focus on the class 3 integron. *J. Clin. Microbiol.* **2003**, *41*, 5407-5413.
- (156) Guerin, F.; Henegar, C.; Spiridon, G.; Launay, O.; Salmon-Ceron, D.; Poyart, C. Bacterial prostatitis due to *Pseudomonas aeruginosa* harbouring the blaVIM-2 metallo- $\beta$ -lactamase gene from Saudi Arabia. *J. Antimicrob. Chemother.* **2005**, *56*, 601-602.
- (157) Wang, C.; Wang, J.; Mi, Z. *Pseudomonas aeruginosa* producing VIM-2 metallo- $\beta$ -lactamases and carrying two aminoglycoside-modifying enzymes in China. *J. Hosp. Infect.* **2006**, *62*, 522-524.
- (158) Toleman, M. A.; Vinodh, H.; Sekar, U.; Kamat, V.; Walsh, T. R. blaVIM-2-harboring integrons isolated in India, Russia, and the United States arise from an ancestral class 1 integron predating the formation of the 3' conserved sequence. *Antimicrob. Agents Chemother.* **2007**, *51*, 2636-2638.
- (159) Yakupogullari, Y.; Poirel, L.; Bernabeu, S.; Kizirgil, A.; Nordmann, P. Multidrug-resistant *Pseudomonas aeruginosa* isolate co-expressing extended-spectrum  $\beta$ -lactamase PER-1 and metallo- $\beta$ -lactamase VIM-2 from Turkey. *J. Antimicrob. Chemother.* **2008**, *61*, 221-222.
- (160) Mendes, R. E.; Castanheira, M.; Garcia, P.; Guzman, M.; Toleman, M. A.; Walsh, T. R.; Jones, R. N. First isolation of bla(VIM-2) in Latin America: report from the SENTRY Antimicrobial Surveillance Program. *Antimicrob. Agents Chemother.* **2004**, *48*, 1433-1434.
- (161) Sader, H. S.; Castanheira, M.; Mendes, R. E.; Toleman, M.; Walsh, T. R.; Jones, R. N. Dissemination and diversity of metallo- $\beta$ -lactamases in Latin America: report from the SENTRY Antimicrobial Surveillance Program. *Int. J. Antimicrob. Agents* **2005**, *25*, 57-61.
- (162) Villegas, M. V.; Lolans, K.; del Rosario Olivera, M.; Suarez, C. J.; Correa, A.; Queenan, A. M.; Quinn, J. P. First detection of metallo- $\beta$ -lactamase VIM-2 in *Pseudomonas aeruginosa* isolates from Colombia. *Antimicrob. Agents Chemother.* **2006**, *50*, 226-229.
- (163) Lolans, K.; Queenan, A. M.; Bush, K.; Sahud, A.; Quinn, J. P. First nosocomial outbreak of *Pseudomonas aeruginosa* producing an integron-borne metallo- $\beta$ -lactamase (VIM-2) in the United States. *Antimicrob. Agents Chemother.* **2005**, *49*, 3538-3540.
- (164) Aboufaycal, H.; Sader, H. S.; Rolston, K.; Deshpande, L. M.; Toleman, M.; Bodey, G.; Raad, I.; Jones, R. N. blaVIM-2 and blaVIM-7 carbapenemase-producing *Pseudomonas aeruginosa* isolates detected in a tertiary care medical center in the United States: report from the MYSTIC program. *J. Clin. Microbiol.* **2007**, *45*, 614-615.
- (165) Laupland, K. B.; Parkins, M. D.; Church, D. L.; Gregson, D. B.; Louie, T. J.; Conly, J. M.; Elsayed, S.; Pitout, J. D. Population-based epidemiological study of infections caused by carbapenem-resistant *Pseudomonas aeruginosa* in the Calgary Health Region: importance of metallo- $\beta$ -lactamase (MBL)-producing strains. *J. Infect. Dis.* **2005**, *192*, 1606-1612.
- (166) Morfin-Otero, R.; Rodriguez-Noriega, E.; Deshpande, L. M.; Sader, H. S.; Castanheira, M. Dissemination of a bla(VIM-2)-Carrying Integron Among Enterobacteriaceae Species in Mexico: Report from the SENTRY Antimicrobial Surveillance Program. *Microb. Drug Resist.* **2009**, *15*, 33-35.

- (167) Mansour, W.; Poirel, L.; Bettaieb, D.; Bouallegue, O.; Boujaafar, N.; Nordmann, P. Metallo- $\beta$ -lactamase-producing *Pseudomonas aeruginosa* isolates in Tunisia. *Diagn. Microbiol. Infect. Dis.* **2009**, *64*, 458-461.
- (168) Pitout, J. D.; Revathi, G.; Chow, B. L.; Kabera, B.; Kariuki, S.; Nordmann, P.; Poirel, L. Metallo- $\beta$ -lactamase-producing *Pseudomonas aeruginosa* isolated from a large tertiary centre in Kenya. *Clin. Microbiol. Infect.* **2008**, *14*, 755-759.
- (169) Yum, J. H.; Yong, D.; Lee, K.; Kim, H. S.; Chong, Y. A new integron carrying VIM-2 metallo- $\beta$ -lactamase gene cassette in a *Serratia marcescens* isolate. *Diagn. Microbiol. Infect. Dis.* **2002**, *42*, 217-219.
- (170) Yum, J. H.; Yi, K.; Lee, H.; Yong, D.; Lee, K.; Kim, J. M.; Rossolini, G. M.; Chong, Y. Molecular characterization of metallo- $\beta$ -lactamase-producing *Acinetobacter baumannii* and *Acinetobacter* genomospecies 3 from Korea: identification of two new integrons carrying the bla(VIM-2) gene cassettes. *J. Antimicrob. Chemother.* **2002**, *49*, 837-840.
- (171) Jeong, S. H.; Lee, K.; Chong, Y.; Yum, J. H.; Lee, S. H.; Choi, H. J.; Kim, J. M.; Park, K. H.; Han, B. H.; Lee, S. W.; Jeong, T. S. Characterization of a new integron containing VIM-2, a metallo- $\beta$ -lactamase gene cassette, in a clinical isolate of *Enterobacter cloacae*. *J. Antimicrob. Chemother.* **2003**, *51*, 397-400.
- (172) Conceicao, T.; Brizio, A.; Duarte, A.; Barros, R. First isolation of bla(VIM-2) in *Klebsiella oxytoca* clinical isolates from Portugal. *Antimicrob. Agents Chemother.* **2005**, *49*, 476.
- (173) Ikonomidis, A.; Tokatlidou, D.; Kristo, I.; Sofianou, D.; Tsakris, A.; Mantzana, P.; Pournaras, S.; Maniatis, A. N. Outbreaks in distinct regions due to a single *Klebsiella pneumoniae* clone carrying a bla VIM-1 metallo- $\beta$ -lactamase gene. *J. Clin. Microbiol.* **2005**, *43*, 5344-5347.
- (174) Shin, K. S.; Han, K.; Lee, J.; Hong, S. B.; Son, B. R.; Youn, S. J.; Kim, J.; Shin, H. S. Imipenem-resistant *Achromobacter xylosoxidans* carrying blaVIM-2-containing class 1 integron. *Diagn. Microbiol. Infect. Dis.* **2005**, *53*, 215-220.
- (175) Poirel, L.; Cabanne, L.; Collet, L.; Nordmann, P. Class II transposon-borne structure harboring metallo- $\beta$ -lactamase gene blaVIM-2 in *Pseudomonas putida*. *Antimicrob. Agents Chemother.* **2006**, *50*, 2889-2891.
- (176) Lee, H. W.; Kang, H. Y.; Shin, K. S.; Kim, J. Multidrug-resistant *Providencia* isolates carrying blaPER-1, blaVIM-2, and armA. *J. Microbiol.* **2007**, *45*, 272-274.
- (177) Yamaguchi, Y.; Jin, W.; Matsunaga, K.; Ikemizu, S.; Yamagata, Y.; Wachino, J.; Shibata, N.; Arakawa, Y.; Kurosaki, H. Crystallographic investigation of the inhibition mode of a VIM-2 metallo- $\beta$ -lactamase from *Pseudomonas aeruginosa* by a mercaptocarboxylate inhibitor. *J. Med. Chem.* **2007**, *50*, 6647-6653.
- (178) Garcia-Saez, I.; Docquier, J. D.; Rossolini, G. M.; Dideberg, O. The three-dimensional structure of VIM-2, a Zn- $\beta$ -lactamase from *Pseudomonas aeruginosa* in its reduced and oxidised form. *J. Mol. Biol.* **2008**, *375*, 604-611.
- (179) Yan, J. J.; Hsueh, P. R.; Ko, W. C.; Luh, K. T.; Tsai, S. H.; Wu, H. M.; Wu, J. J. Metallo- $\beta$ -lactamases in clinical *Pseudomonas* isolates in Taiwan and identification of VIM-3, a novel variant of the VIM-2 enzyme. *Antimicrob. Agents Chemother.* **2001**, *45*, 2224-2228.
- (180) Yan, J. J.; Hsueh, P. R.; Lu, J. J.; Chang, F. Y.; Ko, W. C.; Wu, J. J. Characterization of acquired  $\beta$ -lactamases and their genetic support in multidrug-resistant *Pseudomonas*

- aeruginosa* isolates in Taiwan: the prevalence of unusual integrons. *J. Antimicrob. Chemother.* **2006**, *58*, 530-536.
- (181) Pournaras, S.; Tsakris, A.; Maniati, M.; Tzouvelekis, L. S.; Maniatis, A. N. Novel variant (bla(VIM-4)) of the metallo- $\beta$ -lactamase gene bla(VIM-1) in a clinical strain of *Pseudomonas aeruginosa*. *Antimicrob. Agents Chemother.* **2002**, *46*, 4026-4028.
- (182) Giske, C. G.; Rylander, M.; Kronvall, G. VIM-4 in a carbapenem-resistant strain of *Pseudomonas aeruginosa* isolated in Sweden. *Antimicrob. Agents Chemother.* **2003**, *47*, 3034-3035.
- (183) Luzzaro, F.; Docquier, J. D.; Colimon, C.; Endimiani, A.; Lombardi, G.; Amicosante, G.; Rossolini, G. M.; Toniolo, A. Emergence in *Klebsiella pneumoniae* and *Enterobacter cloacae* clinical isolates of the VIM-4 metallo- $\beta$ -lactamase encoded by a conjugative plasmid. *Antimicrob. Agents Chemother.* **2004**, *48*, 648-650.
- (184) Patzer, J.; Toleman, M. A.; Deshpande, L. M.; Kaminska, W.; Dzierzanowska, D.; Bennett, P. M.; Jones, R. N.; Walsh, T. R. *Pseudomonas aeruginosa* strains harbouring an unusual blaVIM-4 gene cassette isolated from hospitalized children in Poland (1998-2001). *J. Antimicrob. Chemother.* **2004**, *53*, 451-456.
- (185) Libisch, B.; Gacs, M.; Csiszar, K.; Muzslay, M.; Rokusz, L.; Fuzi, M. Isolation of an integron-borne blaVIM-4 type metallo- $\beta$ -lactamase gene from a carbapenem-resistant *Pseudomonas aeruginosa* clinical isolate in Hungary. *Antimicrob. Agents Chemother.* **2004**, *48*, 3576-3578.
- (186) Figueiredo, S.; Poirel, L.; Papa, A.; Koulourida, V.; Nordmann, P. First identification of VIM-4 metallo- $\beta$ -lactamase in *Acinetobacter* spp. *Clin. Microbiol. Infect.* **2008**, *14*, 289-290.
- (187) Bogaerts, P.; Huang, T. D.; Rodriguez-Villalobos, H.; Bauraing, C.; Deplano, A.; Struelens, M. J.; Glupczynski, Y. Nosocomial infections caused by multidrug-resistant *Pseudomonas putida* isolates producing VIM-2 and VIM-4 metallo- $\beta$ -lactamases. *J. Antimicrob. Chemother.* **2008**, *61*, 749-751.
- (188) Ktari, S.; Arlet, G.; Mnif, B.; Gautier, V.; Mahjoubi, F.; Ben Jmeaa, M.; Bouaziz, M.; Hammami, A. Emergence of multidrug-resistant *Klebsiella pneumoniae* isolates producing VIM-4 metallo- $\beta$ -lactamase, CTX-M-15 extended-spectrum  $\beta$ -lactamase, and CMY-4 AmpC  $\beta$ -lactamase in a Tunisian university hospital. *Antimicrob. Agents Chemother.* **2006**, *50*, 4198-4201.
- (189) Peleg, A. Y.; Bell, J. M.; Hofmeyr, A.; Wiese, P. Inter-country transfer of Gram-negative organisms carrying the VIM-4 and OXA-58 carbapenem-hydrolysing enzymes. *J. Antimicrob. Chemother.* **2006**, *57*, 794-795.
- (190) Libisch, B.; Giske, C. G.; Kovacs, B.; Toth, T. G.; Fuzi, M. Identification of the first VIM metallo- $\beta$ -lactamase-producing multiresistant *Aeromonas hydrophila* strain. *J. Clin. Microbiol.* **2008**, *46*, 1878-1880.
- (191) Bahar, G.; Mazzariol, A.; Koncan, R.; Mert, A.; Fontana, R.; Rossolini, G. M.; Cornaglia, G. Detection of VIM-5 metallo- $\beta$ -lactamase in a *Pseudomonas aeruginosa* clinical isolate from Turkey. *J. Antimicrob. Chemother.* **2004**, *54*, 282-283.
- (192) Gacar, G. G.; Midilli, K.; Kolayli, F.; Ergen, K.; Gundes, S.; Hosoglu, S.; Karadenizli, A.; Vahaboglu, H. Genetic and enzymatic properties of metallo- $\beta$ -lactamase VIM-5 from a clinical isolate of *Enterobacter cloacae*. *Antimicrob. Agents Chemother.* **2005**, *49*, 4400-4403.

- (193) Poirel, L.; Yakupogullari, Y.; Kizirgil, A.; Dogukan, M.; Nordmann, P. VIM-5 metallo- $\beta$ -lactamase-producing *Pseudomonas putida* from Turkey. *Int. J. Antimicrob. Agents* **2009**, *33*, 287.
- (194) Castanheira, M.; Bell, J. M.; Turnidge, J. D.; Mathai, D.; Jones, R. N. Carbapenem resistance among *Pseudomonas aeruginosa* strains from India: evidence for nationwide endemicity of multiple metallo- $\beta$ -lactamase clones (VIM-2, -5, -6, and -11 and the newly characterized VIM-18). *Antimicrob. Agents Chemother.* **2009**, *53*, 1225-1227.
- (195) Koh, T. H.; Wang, G. C.; Sng, L. H. IMP-1 and a novel metallo- $\beta$ -lactamase, VIM-6, in fluorescent pseudomonads isolated in Singapore. *Antimicrob. Agents Chemother.* **2004**, *48*, 2334-2336.
- (196) Koh, T. H.; Yamaguchi, K.; Ishii, Y. Characterisation of the metallo- $\beta$ -lactamase VIM-6 and its genetic support. *Int. J. Antimicrob. Agents* **2008**, *32*, 446-449.
- (197) Toleman, M. A.; Rolston, K.; Jones, R. N.; Walsh, T. R. blaVIM-7, an evolutionarily distinct metallo- $\beta$ -lactamase gene in a *Pseudomonas aeruginosa* isolate from the United States. *Antimicrob. Agents Chemother.* **2004**, *48*, 329-332.
- (198) Crespo, M. P.; Woodford, N.; Sinclair, A.; Kaufmann, M. E.; Turton, J.; Glover, J.; Velez, J. D.; Castaneda, C. R.; Recalde, M.; Livermore, D. M. Outbreak of carbapenem-resistant *Pseudomonas aeruginosa* producing VIM-8, a novel metallo- $\beta$ -lactamase, in a tertiary care center in Cali, Colombia. *J. Clin. Microbiol.* **2004**, *42*, 5094-5101.
- (199) Villegas, M. V.; Kattan, J. N.; Correa, A.; Lolans, K.; Guzman, A. M.; Woodford, N.; Livermore, D.; Quinn, J. P. Dissemination of *Acinetobacter baumannii* clones with OXA-23 Carbapenemase in Colombian hospitals. *Antimicrob. Agents Chemother.* **2007**, *51*, 2001-2004.
- (200) Woodford, N.; Zhang, J.; Kaufmann, M. E.; Yarde, S.; Tomas Mdel, M.; Faris, C.; Vardhan, M. S.; Dawson, S.; Cotterill, S. L.; Livermore, D. M. Detection of *Pseudomonas aeruginosa* isolates producing VEB-type extended-spectrum  $\beta$ -lactamases in the United Kingdom. *J. Antimicrob. Chemother.* **2008**, *62*, 1265-1268.
- (201) Pasteran, F.; Faccone, D.; Petroni, A.; Rapoport, M.; Galas, M.; Vazquez, M.; Procopio, A. Novel variant (bla(VIM-11)) of the metallo- $\beta$ -lactamase bla(VIM) family in a GES-1 extended-spectrum- $\beta$ -lactamase-producing *Pseudomonas aeruginosa* clinical isolate in Argentina. *Antimicrob. Agents Chemother.* **2005**, *49*, 474-475.
- (202) Lu, P. L.; Huang, L. Y.; Lian, S. T.; Chang, K.; Lin, C. L.; Hwang, I. J.; Chiang, W. G.; Chen, Y. H.; Lin, S. F.; Siu, L. K. How carbapenem-resistant *Acinetobacter* spp. established in a newly constructed hospital. *Int. J. Antimicrob. Agents* **2008**, *31*, 463-466.
- (203) Marchiaro, P.; Tomatis, P. E.; Mussi, M. A.; Pasteran, F.; Viale, A. M.; Limansky, A. S.; Vila, A. J. Biochemical characterization of metallo- $\beta$ -lactamase VIM-11 from a *Pseudomonas aeruginosa* clinical strain. *Antimicrob. Agents Chemother.* **2008**, *52*, 2250-2252.
- (204) Pournaras, S.; Ikonomidis, A.; Tzouveleki, L. S.; Tokatlidou, D.; Spanakis, N.; Maniatis, A. N.; Legakis, N. J.; Tsakris, A. VIM-12, a novel plasmid-mediated metallo- $\beta$ -lactamase from *Klebsiella pneumoniae* that resembles a VIM-1/VIM-2 hybrid. *Antimicrob. Agents Chemother.* **2005**, *49*, 5153-5156.
- (205) Ikonomidis, A.; Labrou, M.; Afkour, Z.; Maniatis, A. N.; Sofianou, D.; Tsakris, A.; Pournaras, S. First occurrence of an *Escherichia coli* clinical isolate producing the VIM-1/VIM-2 hybrid metallo- $\beta$ -lactamase VIM-12. *Antimicrob. Agents Chemother.* **2007**, *51*, 3038-3039.



- (206) Kontou, M.; Pournaras, S.; Kristo, I.; Ikonomidis, A.; Maniatis, A. N.; Stathopoulos, C. Molecular cloning and biochemical characterization of VIM-12, a novel hybrid VIM-1/VIM-2 metallo- $\beta$ -lactamase from a *Klebsiella pneumoniae* clinical isolate, reveal atypical substrate specificity. *Biochemistry* **2007**, *46*, 13170-13178.
- (207) Juan, C.; Beceiro, A.; Gutierrez, O.; Alberti, S.; Garau, M.; Perez, J. L.; Bou, G.; Oliver, A. Characterization of the new metallo- $\beta$ -lactamase VIM-13 and its integron-borne gene from a *Pseudomonas aeruginosa* clinical isolate in Spain. *Antimicrob. Agents Chemother.* **2008**, *52*, 3589-3596.
- (208) Schneider, I.; Keuleyan, E.; Rasshofer, R.; Markovska, R.; Queenan, A. M.; Bauernfeind, A. VIM-15 and VIM-16, two new VIM-2-like metallo- $\beta$ -lactamases in *Pseudomonas aeruginosa* isolates from Bulgaria and Germany. *Antimicrob. Agents Chemother.* **2008**, *52*, 2977-2979.
- (209) Siarkou, V. I.; Vitti, D.; Protonotariou, E.; Ikonomidis, A.; Sofianou, D. Molecular epidemiology of outbreak-related *Pseudomonas aeruginosa* strains carrying the novel variant blaVIM-17 metallo- $\beta$ -lactamase gene. *Antimicrob. Agents Chemother.* **2009**, *53*, 1325-1330.
- (210) Robin, F.; Aggoune-Khinache, N.; Delmas, J.; Naim, M.; Bonnet, R. Novel VIM metallo- $\beta$ -lactamase variant from clinical isolates of Enterobacteriaceae from Algeria. *Antimicrob. Agents Chemother.* **2010**, *54*, 466-470.
- (211) Rodriguez-Martinez, J. M.; Nordmann, P.; Fortineau, N.; Poirel, L. VIM-19, a metallo- $\beta$ -lactamase with increased carbapenemase activity from *Escherichia coli* and *Klebsiella pneumoniae*. *Antimicrob. Agents Chemother.* **2010**, *54*, 471-476.
